# Supplementary material for: A semisynthesis of 3'-O-ethyl-5,6-dihydrospinosyn J based on the spinosyn A aglycone
Source: publisher site journal article supplement (doi:10.3762/bjoc.13.257), 2017-12-06
Supplement: Additional file 1 [file 1860-5397-13-257-S1.pdf]

**Supporting Information**  
**for**  
**A semisynthesis of 3'-O-ethyl-5,6-dihydrospinosyn J**  
**based on the spinosyn A aglycone**

Kai Zhang<sup>1</sup>, Shenglan Liu<sup>1</sup>, Anjun Liu<sup>1</sup>, Hongxin Chai<sup>1</sup>, Jiarong Li<sup>\*1</sup> and Lamusi A<sup>\*2</sup>

Address: <sup>1</sup>School of Chemistry and Chemical Engineering, Beijing Institute of Technology, 5 South Zhongguancun Street, Haidian District, Beijing, China and  
<sup>2</sup>Institute of Grassland Research of CAAS, No. 120 Wulanchabu East Street, Saihan District, Hohhot, China

Email: Jiarong Li - jrli@bit.edu.cn; Lamusi A - alms721@163.com

\*Corresponding author

**Experimental and analytical data**

**Experimental**

**Synthesis of 1-allylrhamnose (1)**

Acetyl chloride (0.96 g, 12.23 mmol) was slowly added to allyl alcohol (0.76 g, 13.12 mmol) at 0 °C, and warmed to room temperature. After 1 h, *L*-rhamnose (0.98 g, 5.97 mmol) was added to the solution. After about 24 h, NaHCO<sub>3</sub> was added to the solution to make the pH slightly alkaline, then the mixture was extracted with ethyl

acetate thrice. The combined organic layers were dried over  $\text{Na}_2\text{SO}_4$  and evaporated under reduced pressure. The residue was purified by column chromatography on silica gel (200–300 mesh) to afford pure **1**, yield 87%. TLC (ethyl acetate/ petroleum ether = 1:1,V:V);  $^1\text{H}$  NMR (400 MHz,  $\text{CDCl}_3$ )  $\delta$ : 1.28 (d,  $J$  = 6.0 Hz, 3H,  $\text{C}_5\text{-CH}_3$ ), 3.46 (m, 1H,  $\text{C}_4\text{-H}$ ), 3.64 (m, 1H,  $\text{C}_3\text{-H}$ ), 3.75 (m, 1H,  $\text{C}_5\text{-H}$ ), 3.95 (m, 2H,  $\text{C}_1\text{-O-CH}_2\text{-}$ ), 3.97 (m, 1H,  $\text{C}_2\text{-H}$ ), 4.29 (s, 3H, 3 $\times$ OH), 4.77 (d,  $J$  = 6.0 Hz, 1H,  $\text{C}_1\text{-H}$ ), 5.16 and 5.30 (m, 2H,  $\text{-CH=CH}_2$ ), 5.88 (m, 1H,  $\text{-CH=CH}_2$ );  $^{13}\text{C}$  NMR (100 MHz,  $\text{CDCl}_3$ )  $\delta$ : 17.6, 88.0, 88.3, 71.0, 71.7, 72.7, 99.0, 117.5, 133.7; MS (ESI)  $m/z$  (%): 203.1 ( $\text{M}^-$ , 100).

### Synthesis of allyl-3-O-ethylrhamnose (**2**)

Compound **1** (1.76 g, 8.63 mmol) and dibutyltin oxide (2.36 g, 9.48 mmol) were successively added to 50 ml toluene, and heated to reflux with stirring for about 4 h. The solvent was distilled off under reduced pressure, and the mixture was dried in vacuum for 1 h. Then DMF (20 ml), CsF (2.61 g, 17.18 mmol) and bromoethane (1.86 g, 17.07 mmol) were added to the mixture under argon gas. After stirring at room temperature for 24 h, the solvent was distilled off under reduced pressure, and the residue was dissolved in dichloromethane. The precipitate was filtered off, and the filtrate was washed with saturated brine and 5% aqueous  $\text{NaHCO}_3$  solution. Then the combined organic layers were dried over  $\text{Na}_2\text{SO}_4$  and evaporated under reduced pressure. The residue was purified by column chromatography on silica gel (200–300 mesh) to afford pure **2**, yield 72%. TLC(ethyl acetate/petroleum ether 1:1, V:V);  $^1\text{H}$  NMR (400 MHz,  $\text{CDCl}_3$ )  $\delta$ : 1.08 (m, 3H,  $\text{C}_5\text{-CH}_3$ ), 1.18 (m, 3H,  $\text{C}_3\text{-OC-CH}_3$ ),

3.46 (m, 2H, C<sub>3</sub>-O-CH<sub>2</sub>-), 3.64 (m, 1H, C<sub>3</sub>-CH), 3.75 (m, 1H, C<sub>5</sub>-H), 3.93 (m, 1H, C<sub>2</sub>-CH), 3.96 (m, 1H, C<sub>4</sub>-H), 4.14 (m, 2H, C<sub>1</sub>-O-CH<sub>2</sub>-), 4.29 (m, 2H, 2×OH), 4.77 (s, 1H, C<sub>1</sub>-H), 5.09 and 5.18 (2m, 2H, CH=CH<sub>2</sub>), 5.78 (m, 1H, CH=CH<sub>2</sub>) ; <sup>13</sup>C NMR (100 MHz, CDCl<sub>3</sub>) δ: 15.6, 17.8, 65.0, 67.8, 67.9, 68.0, 71.5, 79.8, 98.6, 117.6, 133.9; MS (ESI) *m/z* (%): 255.1 (M+Na, 100).

### Synthesis of allyl 3-O-ethyl-2,4-di-O-methylrhamnoside (3)

Compound **2** (0.62 g, 2.67 mmol) was dissolved in 10 ml DMF, then NaH (0.10 g, 3.21 mmol) was slowly added at 0 °C. After 15 min, CH<sub>3</sub>I (1.01 g, 6.41 mmol) was added to the solution at room temperature. After 4 h of stirring, 5 ml ammonium hydroxide solution was added, and the mixture was extracted with ethyl acetate thrice. The combined organic layers were dried over Na<sub>2</sub>SO<sub>4</sub> and evaporated under reduced pressure. The residue was purified by column chromatography on silica gel (200–300 mesh) to afford pure **3**, yield 79%. TLC (ethyl acetate/petroleum ether 1:10, V:V); <sup>1</sup>H NMR (400 MHz, CDCl<sub>3</sub>) δ: 1.18 (m, 6H, C<sub>5</sub>-CH<sub>3</sub>, C<sub>3</sub>-OC-CH<sub>3</sub>), 3.10 (m, 1H, C<sub>4</sub>-H), 3.39 (m, 9H, C<sub>2</sub>-OCH<sub>3</sub>, C<sub>3</sub>-OCH<sub>3</sub>, C<sub>3</sub>-OCH<sub>2</sub>-, C<sub>3</sub>-H), 3.71 (m, 2H, C<sub>1</sub>-OCH<sub>2</sub>-), 3.96 (m, 1H, C<sub>2</sub>-H), 4.16 (m, 1H, C<sub>5</sub>-H), 4.84 (s, 1H, C<sub>1</sub>-CH), 5.20 and 5.30 (2m, 2H, CH=CH<sub>2</sub>), 5.93 (m, 1H, CH=CH<sub>2</sub>) ; <sup>13</sup>C NMR (100 MHz, CDCl<sub>3</sub>) δ: 15.7, 17.8, 59.2, 61.0, 65.6, 67.8, 67.9, 78.2, 79.7, 82.0, 96.2, 117.3, 133.9; MS (ESI) *m/z* (%): 283.2 (M+Na, 100).

### Synthesis of 3-O-ethyl-2,4-di-O-methylrhamnose (4)

Compound **3** (0.27 g, 1.04 mmol) and Pd(PPh<sub>3</sub>)<sub>4</sub> (0.58 g, 0.51 mmol) were added to 5ml acetic acid under argon gas, and heated to 80 °C with stirring for 3 h. When the

reaction was complete (by TLC monitoring), the solvent was distilled off under reduced pressure, and the residue was purified by column chromatography on silica gel (200–300 mesh) to afford pure **4**, yield 81%. TLC (ethyl acetate/petroleum ether 1:3, V:V);  $^1\text{H}$  NMR (400 MHz,  $\text{CDCl}_3$ )  $\delta$ : 1.12–1.20 (m, 6H,  $\text{C}_5\text{-CH}_3$ ,  $\text{C}_3\text{-OC-CH}_3$ ), 3.40 (s, 3H,  $\text{C}_4\text{-OCH}_3$ ), 3.62 (s, 3H,  $\text{C}_2\text{-OCH}_3$ ), 3.92 (m, 2H,  $\text{C}_2\text{-H}$ ,  $\text{C}_4\text{-H}$ ), 4.07 (m, 2H,  $\text{C}_3\text{-OCH}_2\text{-}$ ), 4.74 (s, 1H, OH), 5.07–5.20 (m, 2H,  $\text{C}_3\text{-H}$ ,  $\text{C}_5\text{-H}$ ), 5.80 (m, 1H,  $\text{C}_1\text{-H}$ );  $^{13}\text{C}$  NMR (100 MHz,  $\text{CDCl}_3$ )  $\delta$ : 133.89, 117.62, 98.59, 79.77, 71.54, 68.04, 67.89, 64.99, 17.77, 15.62; MS (ESI)  $m/z$  (%): 243.2 ( $\text{M}+\text{Na}$ , 100).

### Synthesis of C9-OTBDMS-substituted aglycone **5**

The aglycone (3.11 g, 7.71 mmol) was added to 60 ml dry  $\text{CH}_2\text{Cl}_2$ , then 4-dimethylaminopyridine (4-DMAP, 1.83 g, 14.98 mmol) and *tert*-butyldimethylsilyl chloride (TBDMS-Cl, 1.39 g, 9.22 mmol) were successively added. After addition of all the reagents, the mixture was heated to reflux with stirring for 5 h. When the reaction was completed (by TLC monitoring), the solution was diluted with  $\text{CH}_2\text{Cl}_2$  and washed with saturated sodium bicarbonate solution thrice. The combined organic layers were dried over  $\text{Na}_2\text{SO}_4$  and evaporated under reduced pressure. The residue was purified by column chromatography on silica gel (200–300 mesh) to afford pure **5**, yield 73%. TLC (ethyl acetate/petroleum ether 1:5, V:V);  $^1\text{H}$  NMR (400 MHz,  $\text{CDCl}_3$ )  $\delta$ : 0.03 (s, 6H,  $\text{Si}(\text{CH}_3)_2$ ), 0.81 (t, 3H,  $\text{C}_{23}\text{-H}$ ), 0.87 (s, 9H,  $3\times\text{CH}_3$ ), 1.20 (d, 3H,  $\text{C}_{24}\text{-H}$ ), 1.25 (m, 1H,  $\text{C}_{11}\text{-H}$ ), 1.38–1.79 (m, 12H,  $\text{C}_8\text{-H}$ ,  $\text{C}_{10}\text{-H}$ ,  $\text{C}_{18}\text{-H}$ ,  $\text{C}_{19}\text{-H}$ ,  $\text{C}_{20}\text{-H}$ ,  $\text{C}_{22}\text{-H}$ ), 2.22 (H, m,  $\text{C}_7\text{-H}$ ), 2.39 (d, 1H,  $J = 13.4\text{Hz}$ ,  $\text{C}_2\text{-H}$ ), 2.87 (m, 1H,  $\text{C}_{12}\text{-H}$ ), 2.99 (m, 1H,  $\text{C}_{16}\text{-H}$ ), 3.12 (d, 1H,  $J = 13.4\text{Hz}$ ,  $\text{C}_2\text{-H}$ ), 3.19 (m, 1H,  $\text{C}_3\text{-H}$ ), 3.43 (m, 1H,

C<sub>4</sub>-H), 3.67 (m, 1H, C<sub>17</sub>-H), 4.34 (m, 1H, C<sub>9</sub>-H), 4.69 (s, 1H, C<sub>21</sub>-H), 5.77(m, 1H, C<sub>5</sub>-H ), 5.85(m, 1H, C<sub>6</sub>-H), 6.79 (s, 1H, C<sub>13</sub>-H); <sup>13</sup>C NMR (100MHz, CDCl<sub>3</sub>) δ: 4.51, 9.16, 15.9, 21.8, 26.1, 28.6, 30.2, 33.0, 34.2, 35.0, 40.8, 40.8, 41.4, 41.7, 46.4, 47.8, 48.2, 49.7, 72.7, 72.8, 77.1, 128.5, 130.1, 144.3, 148.2, 172.8, 202.7; MS (ESI) cal for C<sub>30</sub>H<sub>48</sub>O<sub>5</sub>Si [M+Na]<sup>+</sup> 517.33428, found [M+Na]<sup>+</sup> 517.33417.

### Synthesis of C9-OTBDMS- and C17-OTIPS-substituted aglycone 6

Compound **5** (0.99 g, 1.92 mmol) was dissolved in 60 ml CH<sub>2</sub>Cl<sub>2</sub>, then 2,6-lutidine(0.42 g, 4.01 mmol) and triisopropylsilyl trifluoromethanesulfonate (TIPSOTf, 0.66 g, 2.16 mmol) were successively added at -20 °C. After addition of all the reagents, the mixture was kept at 0 °C and stirred for about 3 h. Then the mixture was diluted with CH<sub>2</sub>Cl<sub>2</sub> and washed with saturated sodium bicarbonate solution thrice. The combined organic layers were dried over Na<sub>2</sub>SO<sub>4</sub> and evaporated under reduced pressure. The residue was purified by column chromatography on silica gel (200–300 mesh) to afford pure **6**, yield 85%. TLC (ethyl acetate/petroleum ether 1:10, V:V); <sup>1</sup>H NMR (400 MHz, CDCl<sub>3</sub>) δ: 1.04 (s, 18H, Si-C-CH<sub>3</sub>), 1.25 (m, 3H, Si-CH-), 0.03 (s, 6H, Si(CH<sub>3</sub>)<sub>2</sub>), 0.81 (t, 3H, C<sub>23</sub>-H), 0.87 (s, 9H, CH<sub>3</sub>), 1.24 (m, 3H, C<sub>24</sub>-H), 1.19 (m, 1H, C<sub>11</sub>-H), (1.37-1.83, 2.21) (m, 2H×6, C<sub>8</sub>-H, C<sub>10</sub>-H, C<sub>18</sub>-H, C<sub>19</sub>-H, C<sub>20</sub>-H, C<sub>22</sub>-H), 2.24 (m, 1H, C<sub>7</sub>-H). 2.42 (d, 1H, *J* = 10.1Hz, C<sub>2</sub>-H), 2.88 (m, 1H, C<sub>12</sub>-H ), 3.02 (m, 1H, C<sub>16</sub>-H), 3.08 (d, 1H, *J*=10.1Hz, C<sub>2</sub>-H), 3.22 (m, 1H, C<sub>3</sub>-H), 3.46 (m, 1H, C<sub>4</sub>-H), 4.05 (m, 1H, C<sub>17</sub>-H), 4.34 (m, 1H, C<sub>9</sub>-H), 4.64 (s, 1H, C<sub>21</sub>-H), 5.76(m, 1H, C<sub>5</sub>-H ), 5.84(m, 1H, C<sub>6</sub>-H), 6.87(1H, s, C<sub>13</sub>-H); <sup>13</sup>C NMR (100 MHz, CDCl<sub>3</sub>) δ: -4.65, 9.47, 13.0, 18.2, 18.5, 26.0, 19.5, 28.0, 31.3, 34.9, 36.8, 40.9,

40.9 41.2 41.6, 46.9, 47.8, 48.8, 49.8, 72.8, 74.7, 76.0, 128.9, 130.0, 143.5, 148.2, 172.7, 203.6; MS (ESI) cal for  $C_{39}H_{68}O_5Si_2$   $[M+H]^+$  673.46780, found  $[M+H]^+$  673.46775.

### Synthesis of C17-OTIPS-substituted aglycone **7**

Compound **6** (0.71 g, 1.04 mmol) was added to a solvent mixture of 20 ml THF, 40 ml HOAc and 25 ml  $H_2O$ , and then the mixture was heated to 70 °C with stirring for about 24 h. Then THF was evaporated under reduced pressure. The mixture was diluted with  $H_2O$ , washed with saturated sodium bicarbonate solution and extracted with EtOAc thrice. The combined organic layers were dried over  $Na_2SO_4$  and evaporated under reduced pressure. The residue was purified by column chromatography on silica gel (200–300 mesh) to afford pure **7**, yield 71%. TLC (ethyl acetate/petroleum ether 1:5, V:V);  $^1H$  NMR (400 MHz,  $CDCl_3$ )  $\delta$ : 1.00 (s, 18H,  $CH_3$ ), 1.25 (t, 3H,  $J=8.6Hz$ , CH), 0.81 (t, 3H,  $J=7.5Hz$ ,  $C_{23}-H$ ), 0.94 (m, 3H,  $C_{24}-H$ ), 1.23 (m, 1H,  $C_{11}-H$ ), (1.42-1.88, 2.36) (m, 12H,  $C_8-H$ ,  $C_{10}-H$ ,  $C_{18}-H$ ,  $C_{19}-H$ ,  $C_{20}-H$ ,  $C_{22}-H$ ), 2.26 (m, 1H,  $C_7-H$ ). 2.41 (d, 1H,  $J=5.0Hz$ , one of  $C_2-H$ ), 2.92 (m, 1H,  $C_{12}-H$ ), 3.04 (m, 1H,  $C_{16}-H$ ), 3.08 (d, 1H,  $J=5.0Hz$ , one of  $C_2-H$ ), 3.23 (m, 1H,  $C_3-H$ ), 3.50 (m, 1H,  $C_4-H$ ), 4.03 (m, 1H,  $C_{17}-H$ ), 4.46 (m, 1H,  $C_9-H$ ), 4.65 (s, 1H,  $C_{21}-H$ ), 5.81(m, 1H,  $C_5-H$ ), 5.87(m, 1H,  $C_6-H$ ), 6.88 (s, 1H,  $C_{13}-H$ );  $^{13}C$  NMR (100 MHz,  $CDCl_3$ )  $\delta$ :13.0, 18.4, 9.6, 18.6, 19.5, 28.1, 31.3, 34.8, 36.8, 40.1, 40.8, 41.2, 41.7, 47.2, 47.8, 48.9, 49.7, 72.5, 74.7, 75.9, 129.3, 129.6, 143.6, 147.8, 172.7, 203.6; MS (ESI) cal for  $C_{33}H_{54}O_5Si$   $[M+H]^+$  559.38133, found  $[M+H]^+$  559.38164.

**Synthesis of (3-*O*-ethyl-2,4-di-*O*-methyl-L-rhamnopyranosyl)-2,2,2-trifluoro-*N*-phenylacetimidate (**8**)**

Compound **4** (0.91 g, 4.09 mmol) was dissolved in 5ml acetone, and then 2,2,2-trifluoro-*N*-phenylethanimidoyl chloride (0.87 g, 4.19 mmol) and potassium carbonate (0.58 g, 4.19 mmol) were successively added. After stirring at room temperature for about 18 h, the mixture was evaporated under reduced pressure. The residue was purified by column chromatography on silica gel (200–300 mesh) to afford pure **8**, yield 87%. TLC (ethyl acetate/petroleum ether 4:1, V:V); <sup>1</sup>H NMR (400 MHz, CDCl<sub>3</sub>) δ: 1.31 (m, 3H, CH<sub>3</sub>), 1.35 (m, 3H, CH<sub>3</sub>), 3.15 (m, 1H, CH), 3.22 (m, 1H, CH), 3.50 (s, 3H, CH<sub>3</sub>), 3.59 (s, 3H, CH<sub>3</sub>), 3.61 (m, 2H, CH<sub>2</sub>), 3.69 (m, 1H, CH), 3.75 (m, 1H, CH), 5.25 (s, 1H, CH); 6.88(m, 1H, CH), 7.14 (s, 1H, CH), 7.33 (m, 1H, CH), 7.44 (s, 1H, CH); 7.59 (s, 1H, CH) ; <sup>13</sup>C NMR (100 MHz, CDCl<sub>3</sub>) δ: 15.6, 17.8, 59.2, 61.1, 67.8, 70.7, 79.7, 82.0, 96.2, 117.3, 119.5, 120.4, 125.4, 129.2, 129.4, 133.9, 143.6; MS (ESI) cal for C<sub>18</sub>H<sub>24</sub>F<sub>3</sub>NO<sub>5</sub> [M+Na]<sup>+</sup> 414.14988, found [M+Na]<sup>+</sup> 414.15034.

**Synthesis of C17-OTIPS-substituted 3'-*O*-ethyl-5,6-dihydrospinosyn J analogue **9****

Compound **8** (0.16 g, 0.29 mmol) and **7** (0.12 g, 0.31 mmol) were added to 5ml CH<sub>2</sub>Cl<sub>2</sub>, and then one drop of TMSOTF (about 0.05 ml) was added at –78 °C. With stirring for 0.5 h, the solution turned red, and was then quenched with sodium chloride solution. The mixture was extracted with EtOAc thrice, and the combined organic layers were dried over Na<sub>2</sub>SO<sub>4</sub> and evaporated under reduced pressure.

The residue was purified by column chromatography on silica gel (200–300 mesh) to afford pure **9**, yield 76%. TLC (ethyl acetate/petroleum ether 1:4, V:V);  $^1\text{H}$  NMR (400 MHz,  $\text{CDCl}_3$ )  $\delta$ : 0.83 (t, 3H,  $J=7.5\text{Hz}$ ,  $\text{C}_{23}\text{-H}$ ), 0.92 (m, 1H,  $\text{C}_{11}\text{-H}$ ), 1.23(d, 3H,  $J = 6.4\text{ Hz}$ ,  $\text{C}_{24}\text{-H}$ ), (1.37-1.93, 2.27) (2H $\times$ 6,  $\text{C}_8\text{-H}$ ,  $\text{C}_{10}\text{-H}$ ,  $\text{C}_{18}\text{-H}$ ,  $\text{C}_{19}\text{-H}$ ,  $\text{C}_{20}\text{-H}$ ,  $\text{C}_{22}\text{-H}$ ), 2.40 and 3.10 (m, 2H,  $\text{C}_2\text{-H}$ ), 2.17 (m, H,  $\text{C}_7\text{-H}$ ), 2.88 (m, 2H,  $\text{C}_{12}\text{-H}$ ), 3.03 (s, 1H,  $\text{C}_{16}\text{-OH}$ ), 3.22 (m H,  $\text{C}_{12}\text{-H}$ ), 3.45 (m, H,  $\text{C}_4\text{-H}$ ), 4.06 (m, 1H,  $\text{C}_{17}\text{-H}$ ), 4.32 (m, 1H,  $\text{C}_9\text{-H}$ ), 4.67 (m, 1H,  $\text{C}_{21}\text{-H}$ ), 5.84(m, 1H,  $\text{C}_5\text{-H}$ ), 5.86(m, 1H,  $\text{C}_6\text{-H}$ ), 6.85 (s, 1H,  $\text{C}_{13}\text{-H}$ ); 1.28 (d, 3H,  $J= 6.5\text{ Hz}$ ,  $\text{C}_5\text{-CH}_3$ ), 1.30 (m, 2H,  $\text{O-CH}_2\text{-}$ ), 3.14 (m, 1H,  $\text{C}_4'\text{-H}$ ), 3.47 (m, 1H,  $\text{C}_3'\text{-H}$ ), 3.50 (s, 3H,  $\text{C}_2'\text{-OCH}_3$ ), 3.50 (s, 3H,  $\text{C}_5'\text{-OC-CH}_3$ ), 3.73 (m, 1H,  $\text{C}_2'\text{-H}$ ), 3.70 (m, 1H,  $\text{C}_5\text{-H}$ ), 3.57 (s, 3H,  $\text{C}_4'\text{-OCH}_3$ ), 4.85 (s, 1H,  $\text{C}_1'\text{-H}$ ), 1.09 (s, 18H,  $\text{Si-C-CH}_3$ ), 1.25 (m, 3H,  $\text{Si-CH-}$ );  $^{13}\text{C}$  NMR (100 MHz,  $\text{CDCl}_3$ )  $\delta$ : 9.6, 13.0, 15.9, 17.9, 18.4, 18.6, 19.5, 28.1, 31.4, 34.9, 36.5, 36.8, 37.7, 41.2, 41.6, 46.6, 47.8, 48.4, 49.6, 59.4, 61.2, 66.7, 68.1, 74.7, 76.0, 77.4, 78.4, 82.2, 82.3, 95.8, 129.3, 129.6, 143.6, 147.8, 172.7, 203.6; MS (ESI) cal for  $\text{C}_{43}\text{H}_{72}\text{O}_9\text{Si}$   $[\text{M}+\text{Na}]^+$  783.48378, found  $[\text{M}+\text{Na}]^+$  783.48396.

### Synthesis of 17-pseudoaglycone of 3'-O-ethyl-5,6-dihydrospinosyn J analogue **10**

Compound **9** (0.21 g, 0.28 mmol) was added to a solvent mixture of 15 ml acetonitrile and 2.5 ml 40% hydrofluoric acid at 0 °C. After stirring for about 12 h, the mixture was diluted with  $\text{H}_2\text{O}$ , washed with saturated sodium bicarbonate solution and extracted with EtOAc thrice. The combined organic layers were dried over  $\text{Na}_2\text{SO}_4$  and evaporated under reduced pressure. The residue was purified by column chromatography on silica gel (200–300 mesh) to afford pure **10**, yield 74%.



TLC (ethyl acetate/petroleum ether 1:1, V:V);  $^1\text{H}$  NMR (400 MHz,  $\text{CDCl}_3$ )  $\delta$ : 0.82 (t, 3H,  $\text{C}_{23}\text{-H}$ ), 0.92 (m, 1H,  $\text{C}_{11}\text{-H}$ ), 1.23 (d, 3H,  $J = 6.4$  Hz,  $\text{C}_{24}\text{-H}$ ), 1.37-1.96 and 2.27 (m, 12H,  $\text{C}_8\text{-H}$ ,  $\text{C}_{10}\text{-H}$ ,  $\text{C}_{18}\text{-H}$ ,  $\text{C}_{19}\text{-H}$ ,  $\text{C}_{20}\text{-H}$ ,  $\text{C}_{22}\text{-H}$ ), 2.41 and 3.12 (m, 2H,  $\text{C}_2\text{-H}$ ), 2.17 (m, 1H,  $\text{C}_7\text{-H}$ ), 2.88 (m, 2H,  $\text{C}_{12}\text{-H}$ ), 3.03 (m, 1H,  $\text{C}_{16}\text{-H}$ ), 3.21 (m, 1H,  $\text{C}_{12}\text{-H}$ ), 3.46 (m, 1H,  $\text{C}_4\text{-H}$ ), 3.62 (m, 1H,  $\text{C}_{17}\text{-H}$ ), 4.32 (m, 1H,  $\text{C}_9\text{-H}$ ), 4.69 (m, 1H,  $\text{C}_{21}\text{-H}$ ), 5.81 (m, 1H,  $\text{C}_6\text{-H}$ ), 5.87 (m, 1H,  $\text{C}_5\text{-H}$ ), 6.78 (s, 1H,  $\text{C}_{13}\text{-H}$ ); 1.28 (d, 3H,  $J=6.5\text{Hz}$ ,  $\text{C}_5\text{-CH}_3$ ), 1.31 (m, 2H,  $\text{C}_4\text{'-O-CH}_2\text{'}$ ), 3.14 (m, 1H,  $\text{C}_4\text{'-H}$ ), 3.48 (m, 1H,  $\text{C}_3\text{'-H}$ ), 3.50 (s, 3H,  $\text{C}_2\text{'-OCH}_3$ ), 3.50 (s, 3H,  $\text{C}_5\text{'-O-C-CH}_3$ ), 3.73 (m, 1H,  $\text{C}_2\text{'-H}$ ), 3.69 (m, 1H,  $\text{C}_5\text{'-H}$ ), 3.57 (s, 3H,  $\text{C}_4\text{'-OCCH}_3$ ), 4.83 (s, 1H,  $\text{C}_1\text{'-H}$ );  $^{13}\text{C}$  NMR (100 MHz,  $\text{CDCl}_3$ )  $\delta$ : 9.5, 15.9, 18.0, 18.6, 21.7, 28.5, 30.2, 34.2, 35.0, 36.4, 37.5, 41.3, 41.6, 46.1, 47.7, 48.2, 49.6, 59.4, 61.2, 66.7, 68.2, 72.8, 76.2, 77.1, 78.6, 79.8, 82.3, 95.9, 128.9, 129.5, 144.5, 147.6, 172.8, 202.9; MS (ESI) cal for  $\text{C}_{34}\text{H}_{52}\text{O}_9$   $[\text{M}+\text{Na}]^+$  627.35035, found  $[\text{M}+\text{Na}]^+$  627.35058.

### Synthesis of forosamineyl trichoroacetimidate (11)

*D*-Forosamine (0.18 g, 1.13 mmol) was added to 10 ml  $\text{CH}_2\text{Cl}_2$ , and then trichloroacetonitrile (0.42 g, 2.91 mmol) and  $\text{Cs}_2\text{CO}_3$  (0.11g, 0.34mmol) were successively added at 0 °C. After stirring for 1 h, the mixture was diluted with  $\text{CH}_2\text{Cl}_2$  and washed with saturated sodium bicarbonate solution. The combined organic layers were dried over  $\text{Na}_2\text{SO}_4$ , and then evaporated under reduced pressure. The residue was used directly in the next reaction.

### Synthesis of 3'-O-ethyl-5,6-dihydrospinosyn J analogue 12

Compound **10** (0.12 g, 0.19 mmol) was added to 20 ml  $\text{CH}_2\text{Cl}_2$ , then **11** (0.09 g, 0.30 mmol) and 0.05 ml trifluoride etherate were added at room temperature. After stirring

for 18 h, the mixture was diluted with  $\text{CH}_2\text{Cl}_2$  and washed with saturated sodium bicarbonate solution. The combined organic layers were dried over  $\text{Na}_2\text{SO}_4$  and evaporated under reduced pressure. The residue was purified by column chromatography on silica gel (200–300 mesh) to afford pure **12**, yield 69%. TLC (methanol/dichloromethane 1:5, V:V);  $^1\text{H}$  NMR (400 MHz,  $\text{CDCl}_3$ )  $\delta$ : 6.70(s, 1H,  $\text{C}_{13}\text{-H}$ ), 5.82(m, 1H,  $\text{C}_6\text{-H}$ ), 5.74(m, 1H,  $\text{C}_5\text{-H}$ ), 4.78(s, 1H,  $\text{C}_1\text{-H}$ ), 4.60(m, 1H,  $\text{C}_{21}\text{-H}$ ), 4.35(d,  $J=3.8\text{Hz}$ , 1H,  $\text{C}_1\text{'-H}$ ), 4.24(m, 1H,  $\text{C}_9\text{-H}$ ), 3.56(m, 1H,  $\text{C}_2\text{'-H}$ ), 3.48-3.38(m, 13H,  $\text{C}_{17}\text{-H}$ ,  $\text{C}_5\text{'-H}$ ,  $\text{C}_4\text{-H}$ ,  $\text{C}_4\text{'-OCH}_3$ ,  $\text{C}_2\text{'-OCH}_3$ ,  $\text{C}_3\text{'-OCH}_2\text{-}$ ,  $\text{C}_3\text{'-H}$ ,  $\text{C}_5\text{'-H}$ ), 3.22(m, 1H,  $\text{C}_{16}\text{-H}$ ), 3.08-3.02(m, 2H, one of  $\text{C}_2\text{-H}$ ,  $\text{C}_3\text{-H}$ ), 2.94(m, 1H,  $\text{C}_4\text{-H}$ ), 2.80(m, 1H,  $\text{C}_{12}\text{-H}$ ), 2.34(m, 1H, one of  $\text{C}_2\text{-H}$ ), 2.21-2.09(m, 10H,  $\text{C}_{10}\text{-H}$ ,  $\text{C}_7\text{-H}$ ,  $\text{C}_4\text{'-H}$ ,  $\text{N}(\text{CH}_3)_2$ ), 1.91-1.66(m, 5H, one of  $\text{C}_8\text{-H}$ , one of  $\text{C}_2\text{'-H}$ , one of  $\text{C}_3\text{'-H}$ , one of  $\text{C}_8\text{-H}$ , one of  $\text{C}_{19}\text{-H}$ ), 1.47-1.28(m, 10H,  $\text{C}_{18}\text{-H}$ , one of  $\text{C}_{20}\text{-H}$ ,  $\text{C}_{22}\text{-H}$ , one of  $\text{C}_2\text{'-H}$ , one of  $\text{C}_3\text{'-H}$ ,  $\text{C}_3\text{'-OC-CH}_3$ ), 1.21-1.17(m, 11H, one of  $\text{C}_{19}\text{-H}$ , one of  $\text{C}_{20}\text{-H}$ ,  $\text{C}_5\text{'-CH}_3$ ,  $\text{C}_{16}\text{-CH}_3$ ), 0.85(m, 1H,  $\text{C}_{11}\text{-H}$ ), 0.75(t,  $J = 7.2\text{Hz}$ , 3H,  $\text{C}_{23}\text{-H}$ );  $^{13}\text{C}$  NMR (101 MHz,  $\text{CDCl}_3$ )  $\delta$  202.76, 172.43, 147.40, 144.11, 129.26, 128.77, 103.40, 95.43, 82.22, 81.05, 80.53, 77.67, 76.61, 76.03, 73.61, 67.88, 64.84, 60.84, 60.26, 58.94, 57.63, 49.38, 47.62, 47.57, 46.00, 41.47, 41.12, 40.65, 37.34, 36.25, 34.27, 30.92, 30.06, 28.36, 21.59, 20.95, 18.90, 18.33, 17.75, 16.08, 14.15, 9.30; MS (MALDI) cal for  $\text{C}_{42}\text{H}_{67}\text{NO}_{10}$   $[\text{M}+\text{Na}]^+$  768.465718, found  $[\text{M}+\text{Na}]^+$  768.465844.

### Synthesis of 3'-O-ethyl-5,6-dihydro spinosyn J

Compound **12** (0.09 g, 0.12 mmol) was dissolved in 20 ml methanol, and then 10% Pd/C (0.0186 g, 0.0175 mmol) was added. The mixture was stirred under hydrogen

at room temperature. After about 48 h of stirring, the mixture was filtered. The filtrate was evaporated under reduced pressure, and the residue was purified by column chromatography on silica gel (200–300 mesh) to afford pure 3'-O-ethyl-5,6-dihydro spinosyn J, yield 91%. TLC (methanol/dichloromethane 1:8, V:V);  $^1\text{H}$  NMR (400 MHz,  $\text{CDCl}_3$ )  $\delta$ : 6.86(s, 1H,  $\text{C}_{13}\text{-H}$ ), 4.84(s, 1H,  $\text{C}_1\text{-H}$ ), 4.60(m, 1H,  $\text{C}_{21}\text{-H}$ ), 4.44(d,  $J=8.4\text{Hz}$ , 1H,  $\text{C}_1\text{-H}$ ), 4.21(m, 1H,  $\text{C}_9\text{-H}$ ), 3.73(m, 1H,  $\text{C}_2\text{-H}$ ), 3.65(m, 1H,  $\text{C}_5\text{-H}$ ), 3.62(m, 1H,  $\text{C}_{17}\text{-H}$ ), 3.57-3.48(m, 11H,  $\text{C}_5\text{-H}$ ,  $\text{C}_4\text{-H}$ ,  $\text{C}_4\text{-OCH}_3$ ,  $\text{C}_2\text{-OCH}_3$ ,  $\text{C}_3\text{-OCH}_2\text{-}$ ,  $\text{C}_3\text{-H}$ ), 3.44(m, 1H,  $\text{C}_{16}\text{-H}$ ), 3.42-3.40 (m, 2H, one of  $\text{C}_2\text{-H}$ ,  $\text{C}_3\text{-H}$ ), 3.11(m, 1H,  $\text{C}_4\text{-H}$ ), 2.81(m, 1H,  $\text{C}_{12}\text{-H}$ ), 2.35(m, 1H, one of  $\text{C}_2\text{-H}$ ), 2.30-2.22(m, 10H,  $\text{C}_{10}\text{-H}$ ,  $\text{C}_7\text{-H}$ ,  $\text{C}_4\text{-H}$ ,  $\text{N}(\text{CH}_3)_2$ ), 1.98-1.81(m, 5H, one of  $\text{C}_8\text{-H}$ , one of  $\text{C}_2\text{-H}$ , one of  $\text{C}_3\text{-H}$ , one of  $\text{C}_8\text{-H}$ , one of  $\text{C}_{19}\text{-H}$ ), 1.57-1.43(m, 12H,  $\text{C}_{18}\text{-H}$ , one of  $\text{C}_{20}\text{-H}$ ,  $\text{C}_{22}\text{-H}$ , one of  $\text{C}_2\text{-H}$ , one of  $\text{C}_3\text{-H}$ ,  $\text{C}_3\text{-OC-CH}_3$ , one of  $\text{C}_5\text{-H}$ , one of  $\text{C}_6\text{-H}$ ), 1.28-1.16(m, 13H, one of  $\text{C}_{19}\text{-H}$ , one of  $\text{C}_{20}\text{-H}$ ,  $\text{C}_5\text{-CH}_3$ ,  $\text{C}_{16}\text{-CH}_3$ , one of  $\text{C}_5\text{-H}$ , one of  $\text{C}_6\text{-H}$ ,  $\text{C}_5\text{-CH}_3$ ), 1.03(m, 1H,  $\text{C}_{11}\text{-H}$ ), 0.82(t,  $J = 7.4\text{Hz}$ , 3H,  $\text{C}_{23}\text{-H}$ );  $^{13}\text{C}$  NMR (101 MHz,  $\text{CDCl}_3$ )  $\delta$  203.28, 172.48, 149.45, 145.07, 103.22, 95.73, 82.11, 80.28, 79.56, 78.48, 75.72, 75.55, 73.35, 68.14, 67.83, 65.44, 64.80, 60.84, 59.09, 49.98, 47.79, 46.44, 43.15, 40.92, 40.52, 39.47, 38.68, 37.94, 34.21, 32.94, 30.76, 29.91, 28.35, 26.94, 24.43, 21.83, 18.89, 18.69, 17.73, 15.92, 15.64, 9.25. MS (MALDI) cal for  $\text{C}_{42}\text{H}_{69}\text{NO}_{10}$   $[\text{M}+\text{Na}]^+$  770.481368, found  $[\text{M}+\text{Na}]^+$  770.481264.

# Analytical data

## <sup>1</sup>H NMR of **1**

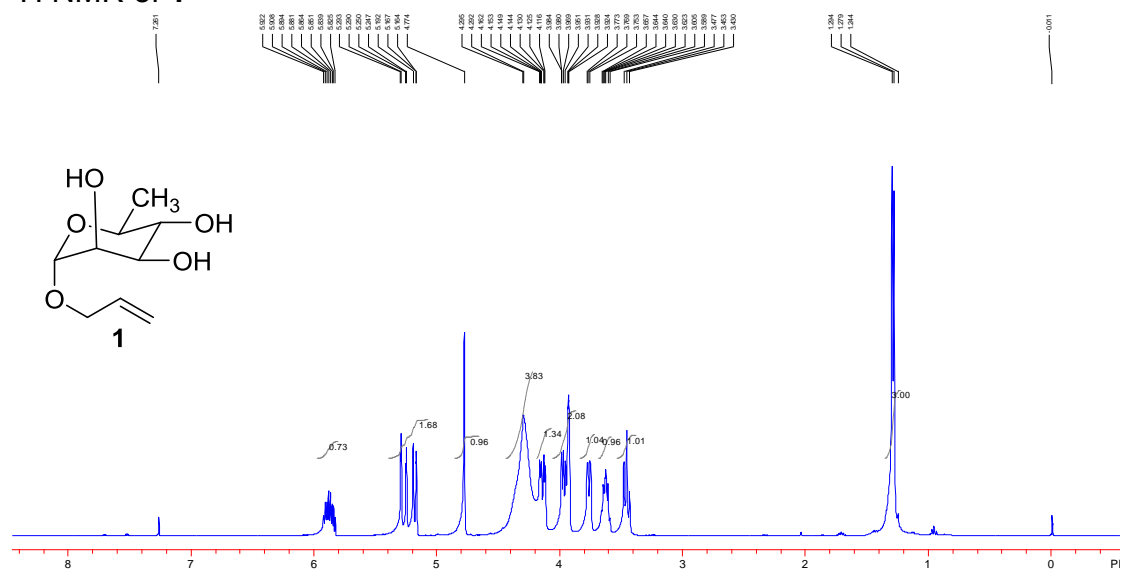

## <sup>13</sup>C NMR of **1**

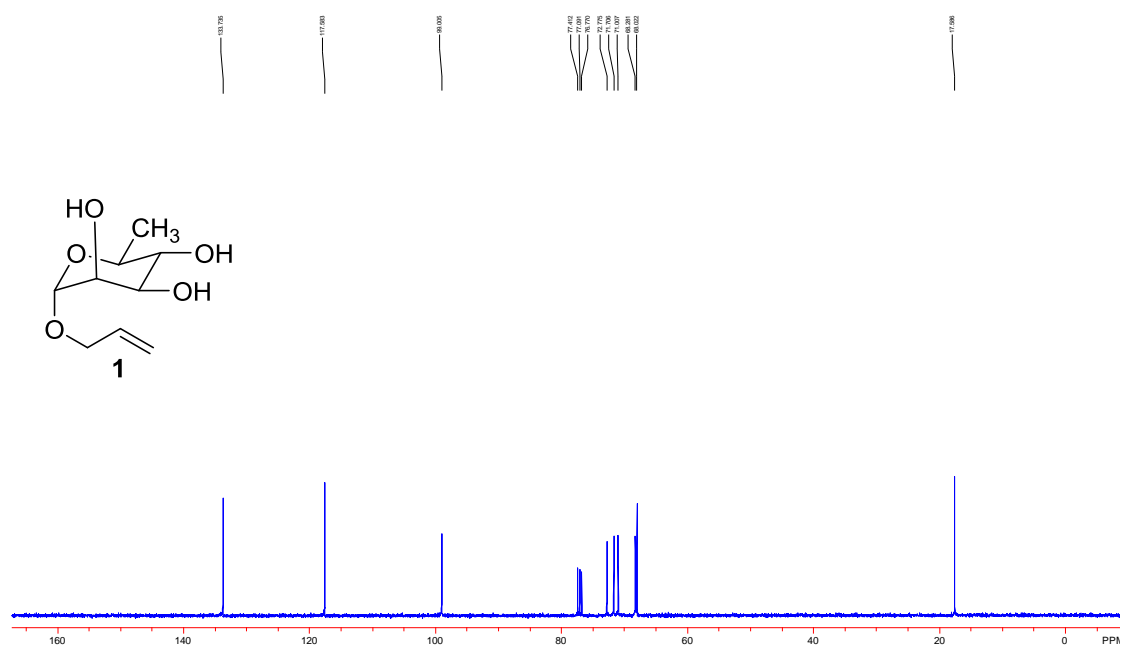

# <sup>1</sup>H NMR of 2

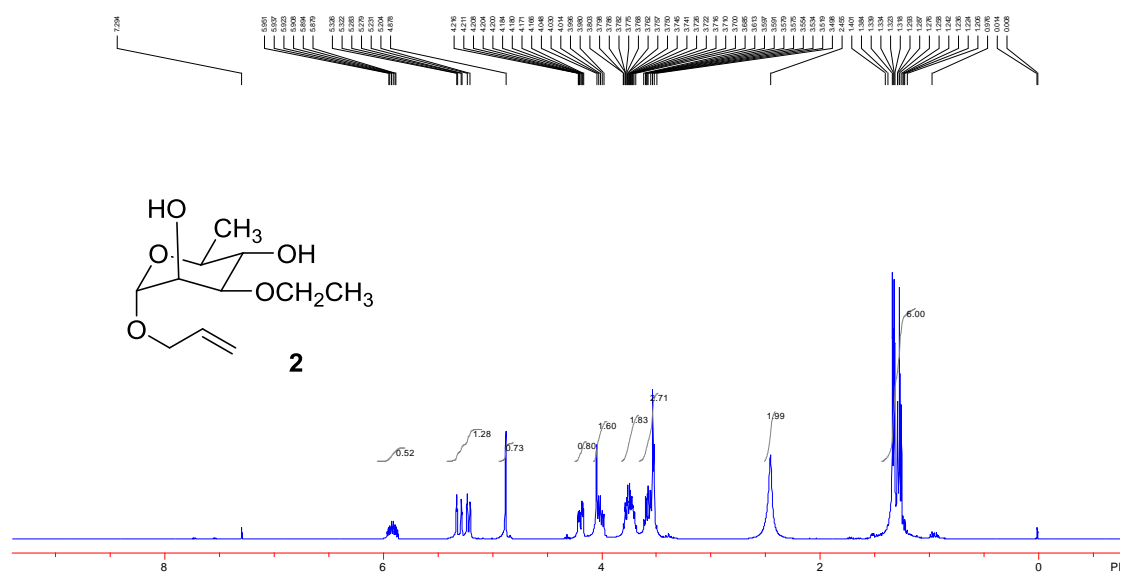

# <sup>13</sup>C NMR of 2

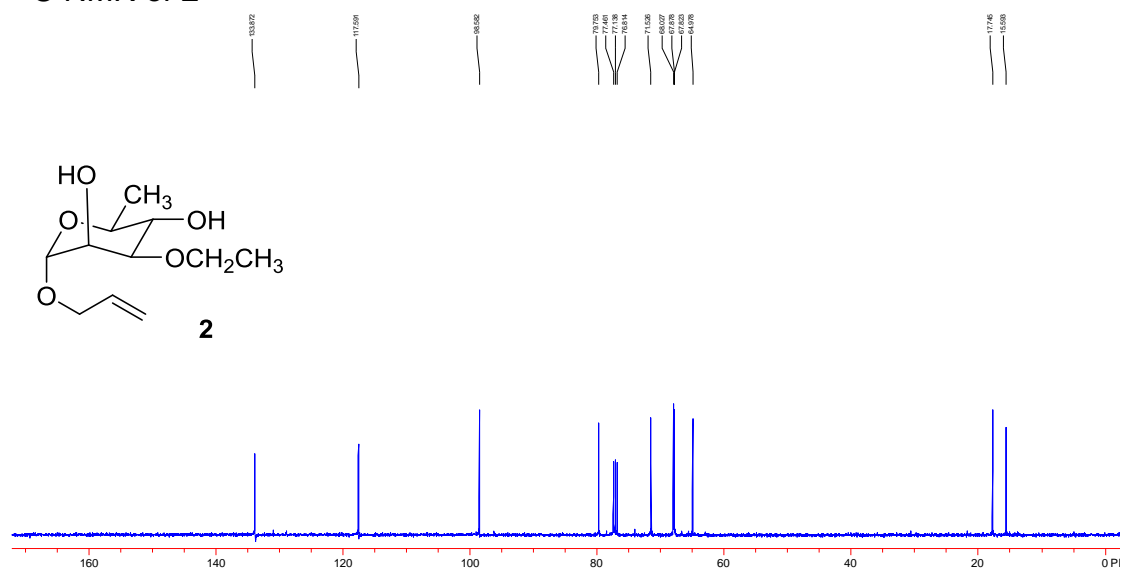

# <sup>1</sup>H NMR of **3**

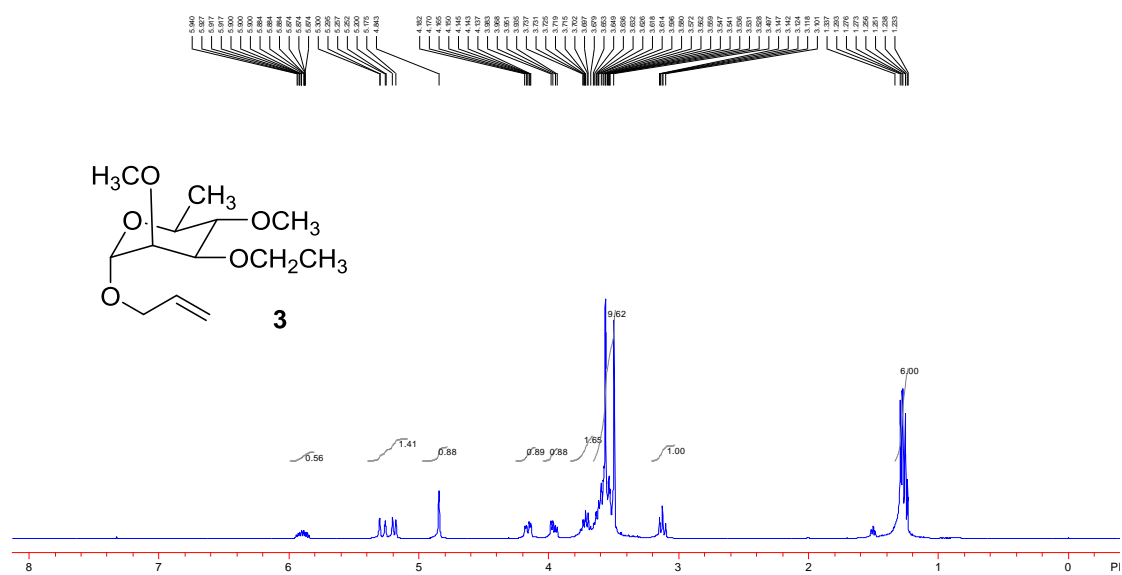

# <sup>13</sup>C NMR of **3**

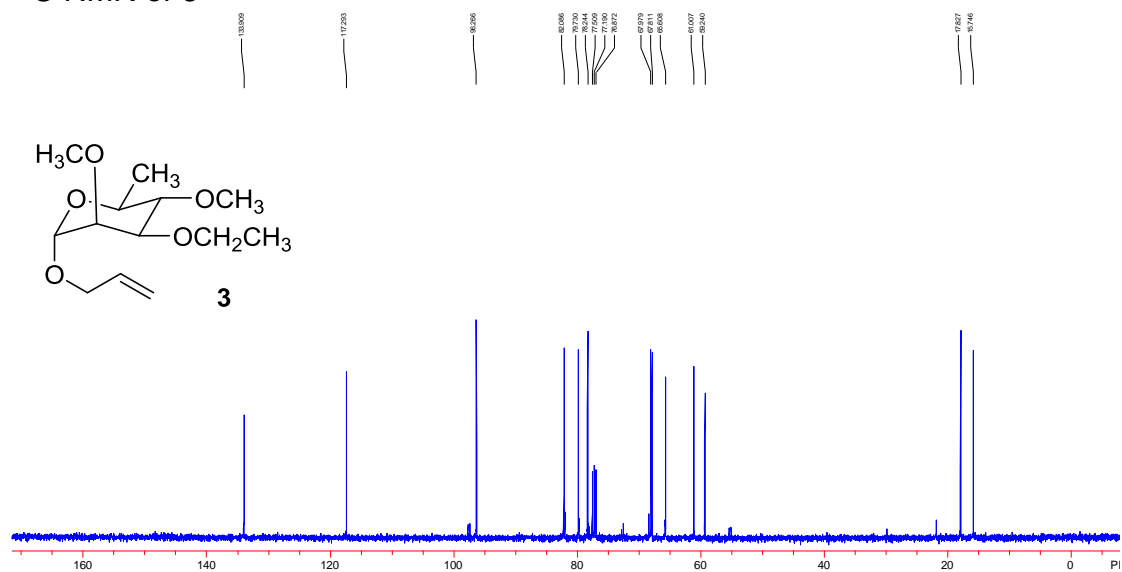

# <sup>1</sup>H NMR of 4

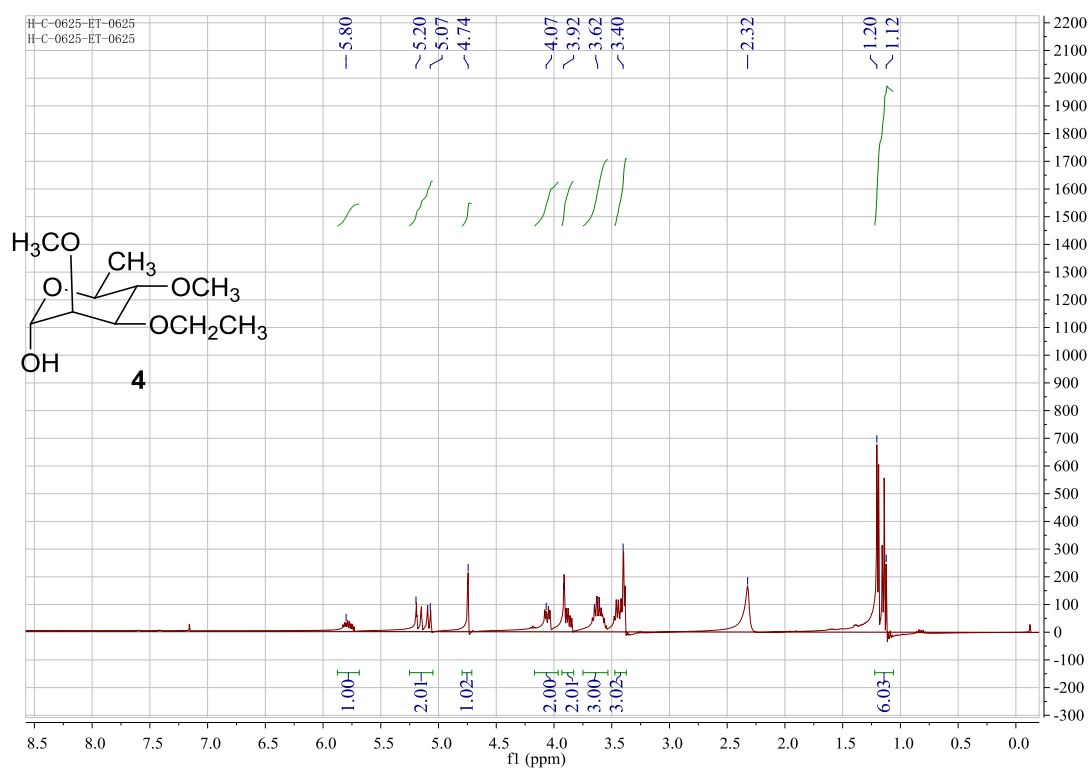

# <sup>13</sup>C NMR of 4

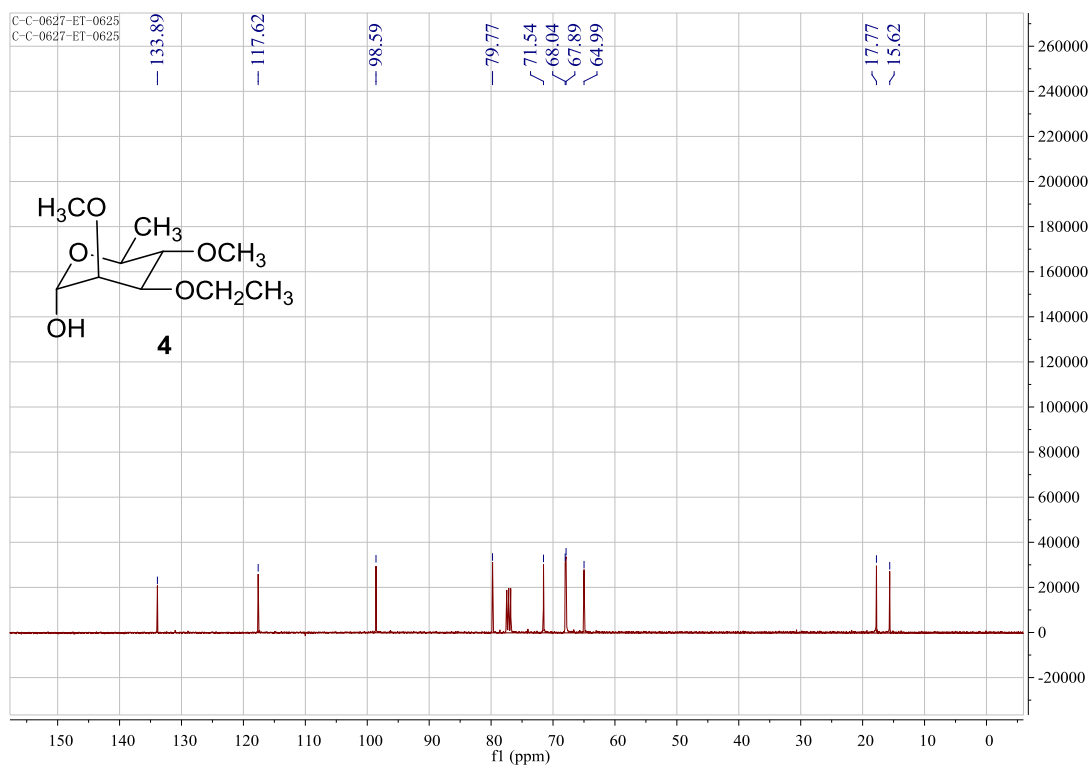

# <sup>1</sup>H NMR of 5

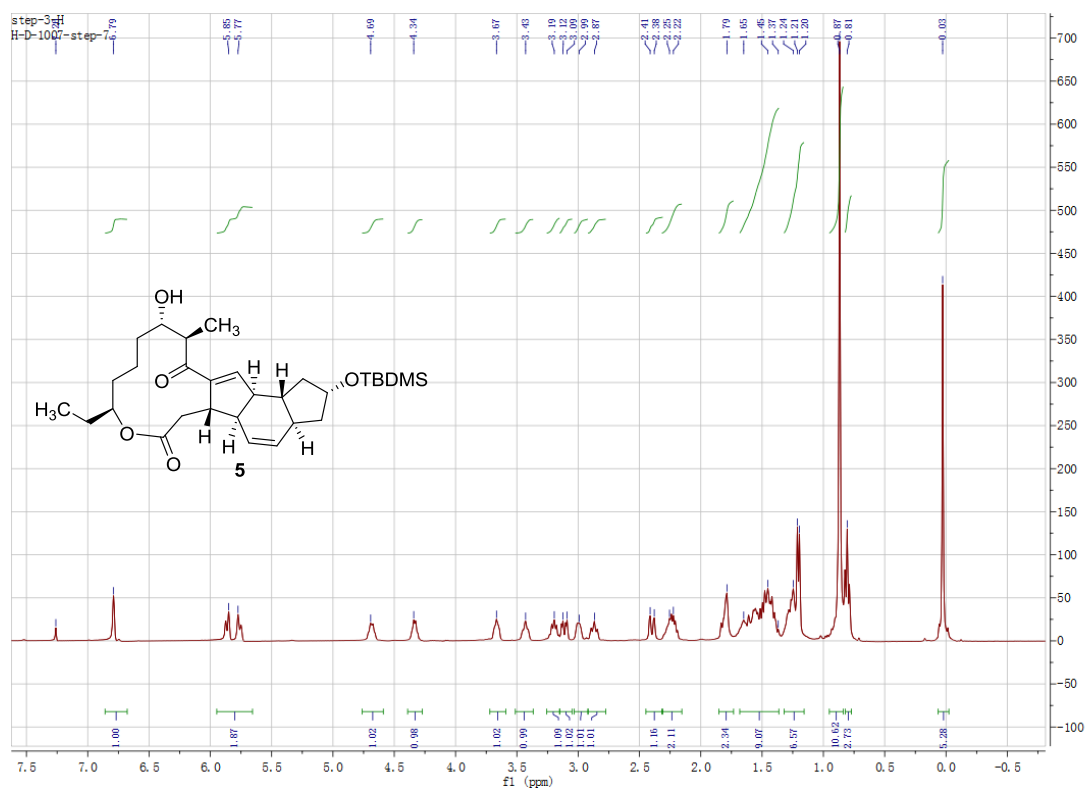

# <sup>13</sup>C NMR of 5

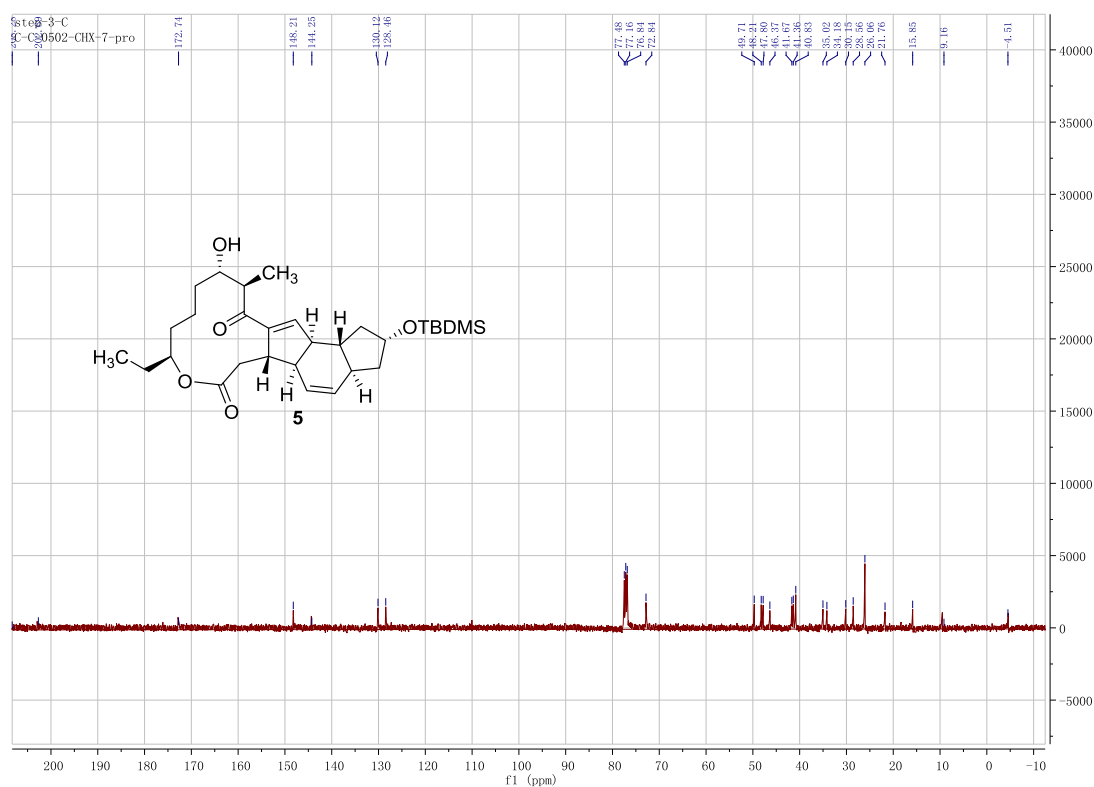



<sup>1</sup>H NMR of **6**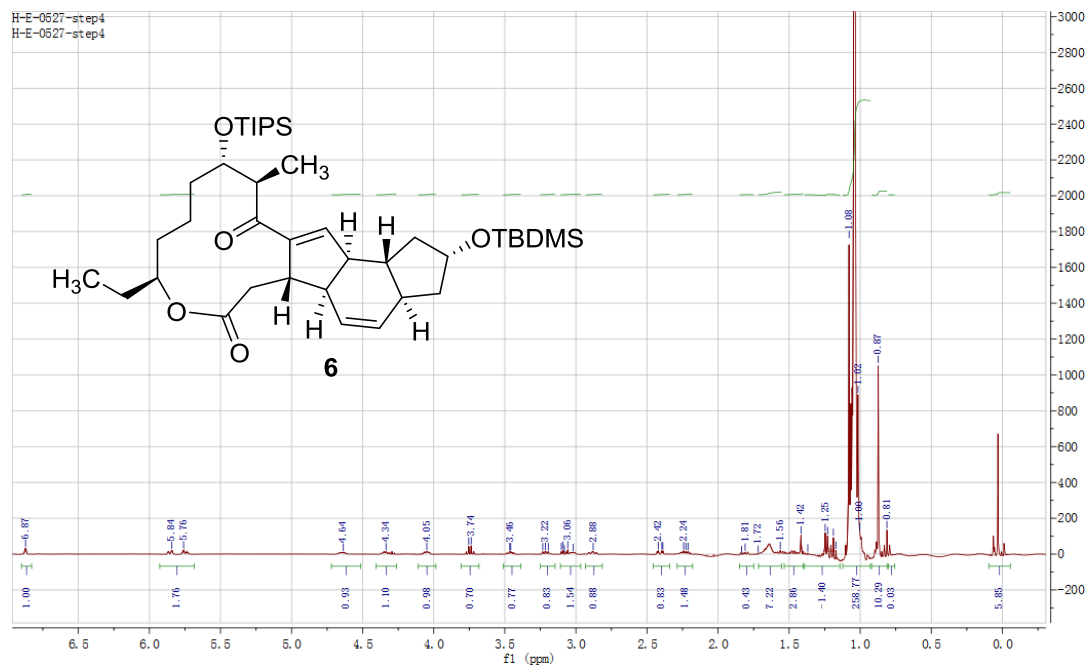 $^{13}\text{C}$  NMR of **6**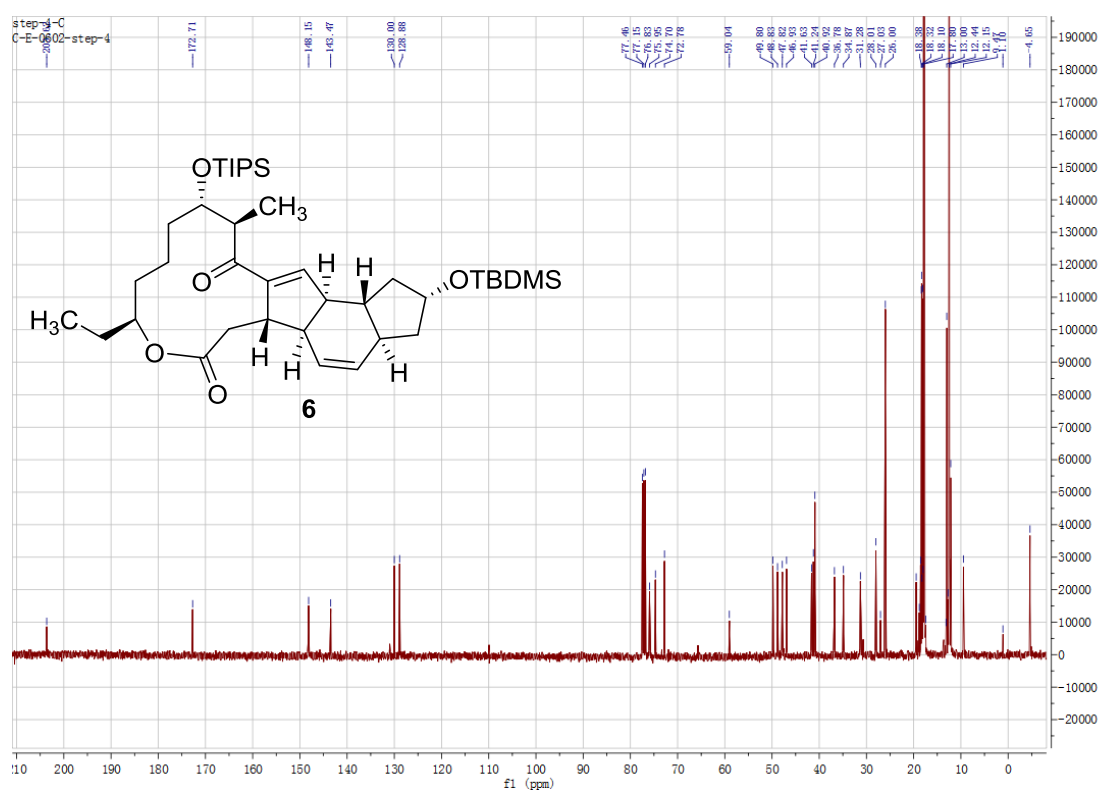

<sup>1</sup>H NMR of **7**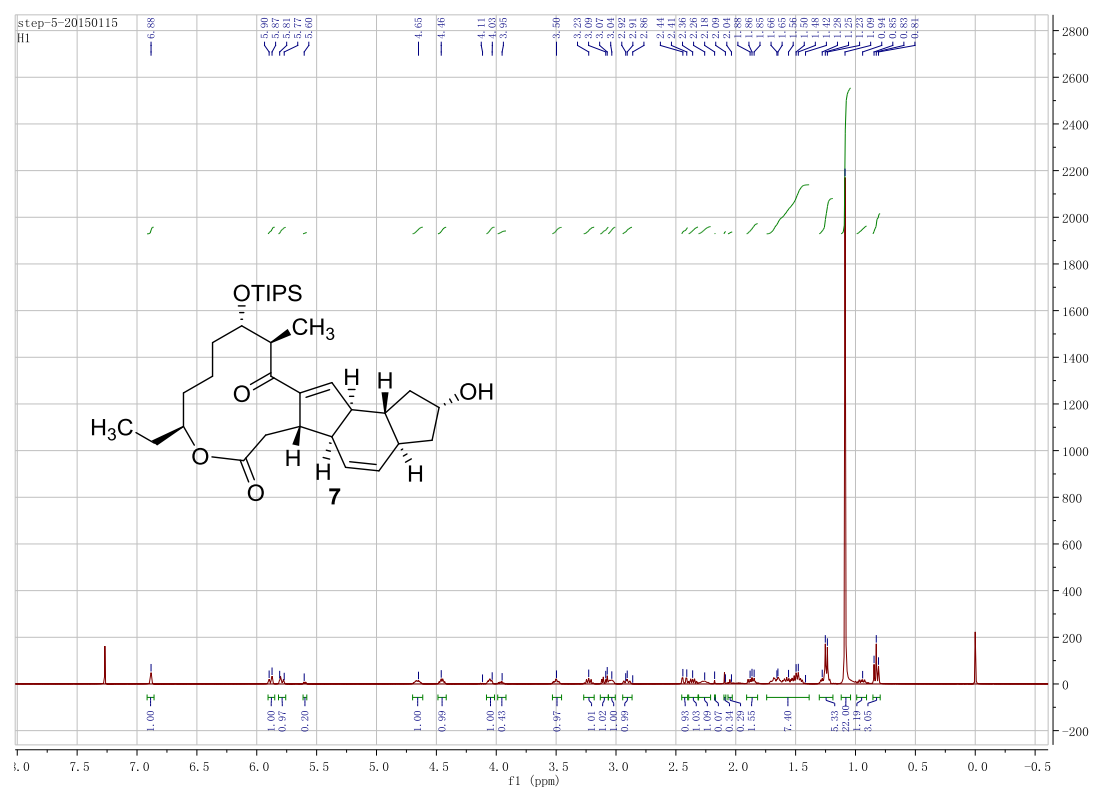<sup>13</sup>C NMR of **7**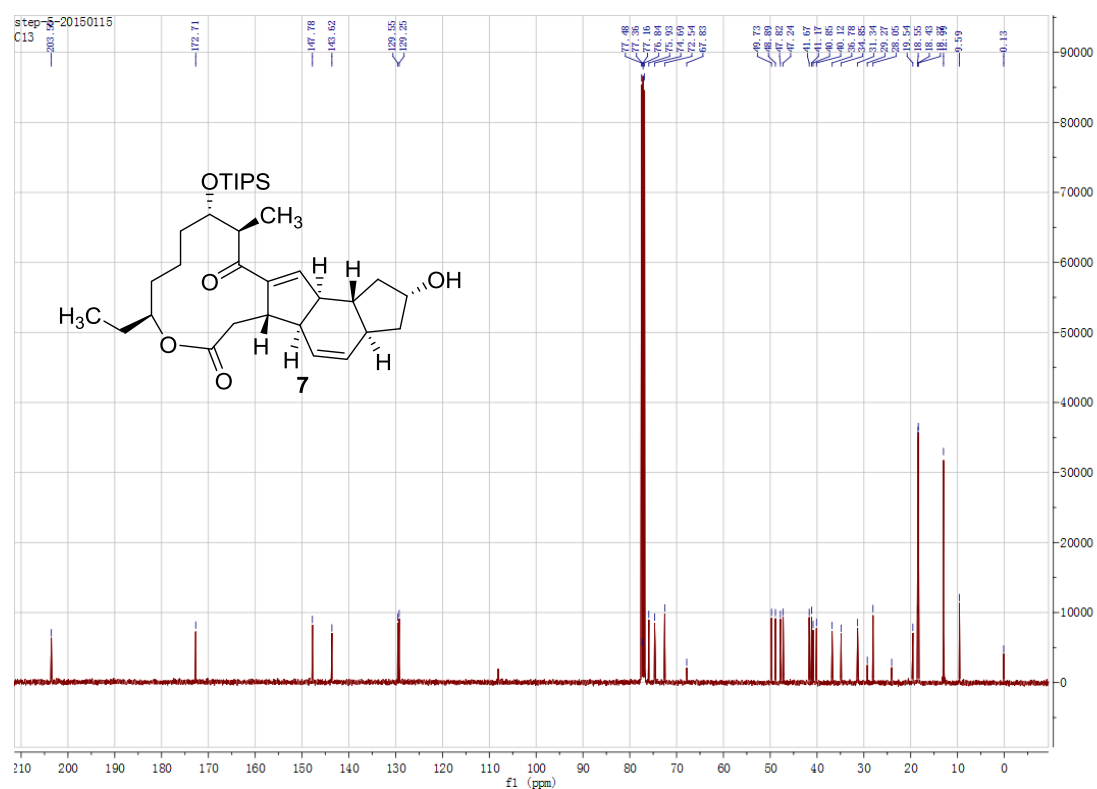

<sup>1</sup>H NMR of **8**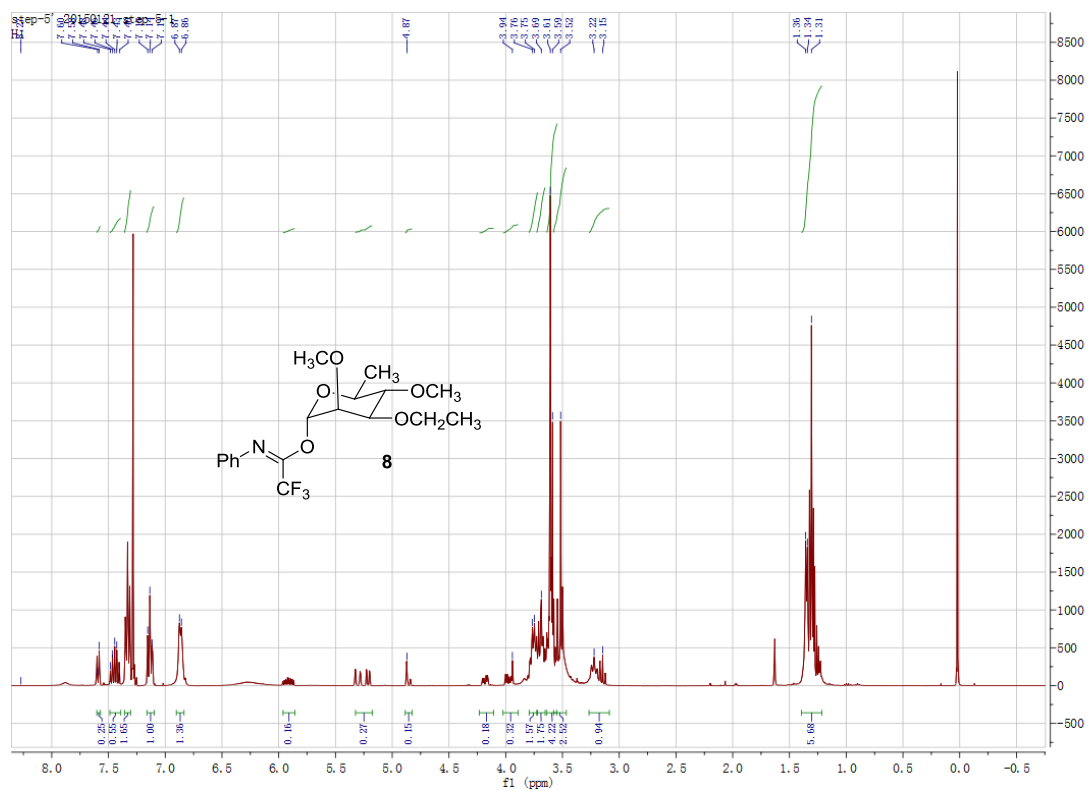<sup>13</sup>C NMR of **8**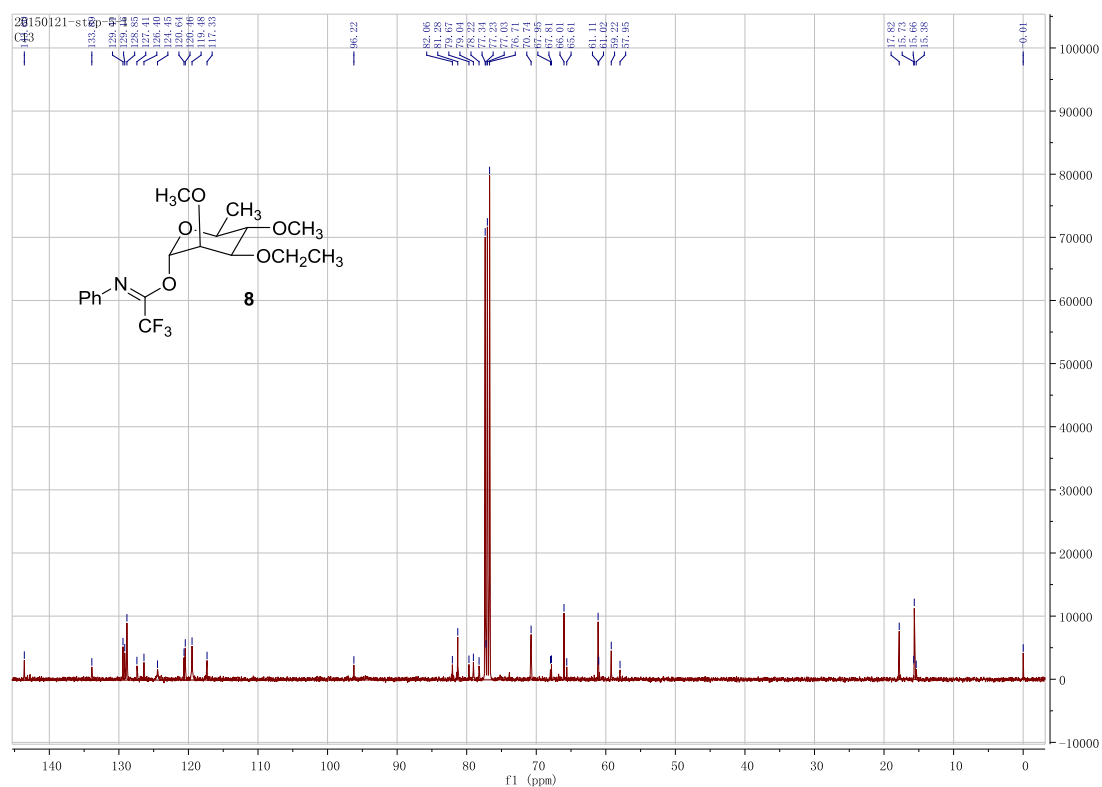

# <sup>1</sup>H NMR of 9

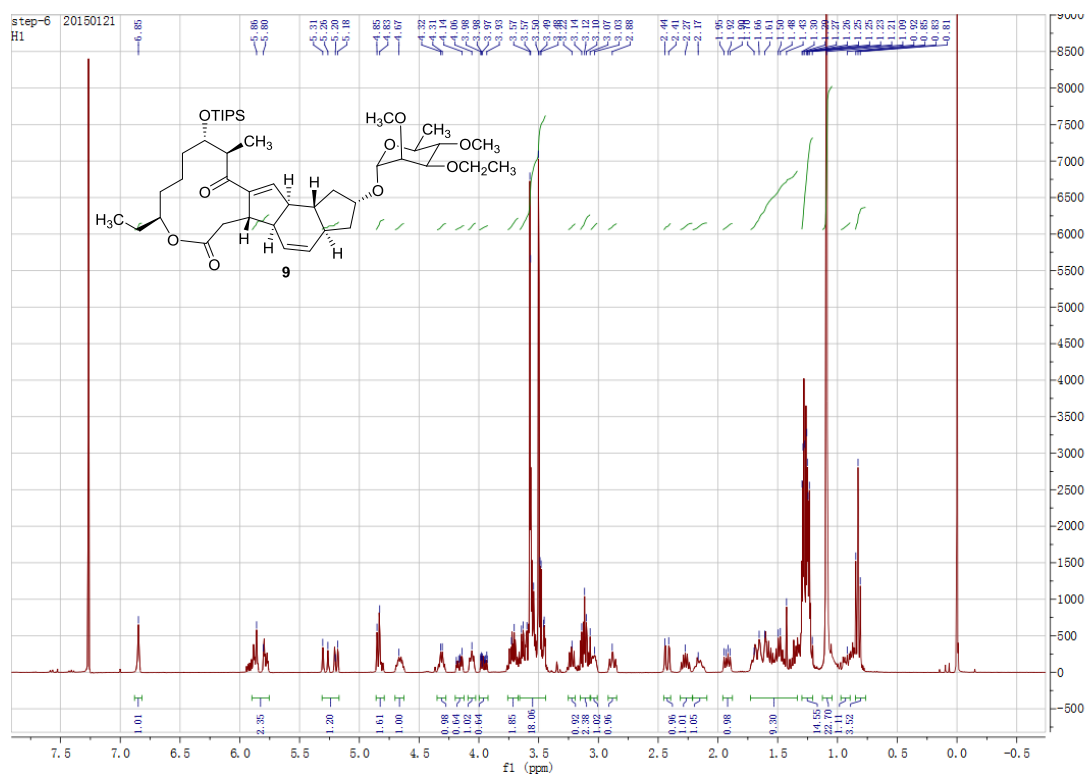

# <sup>1</sup>H NMR of 10

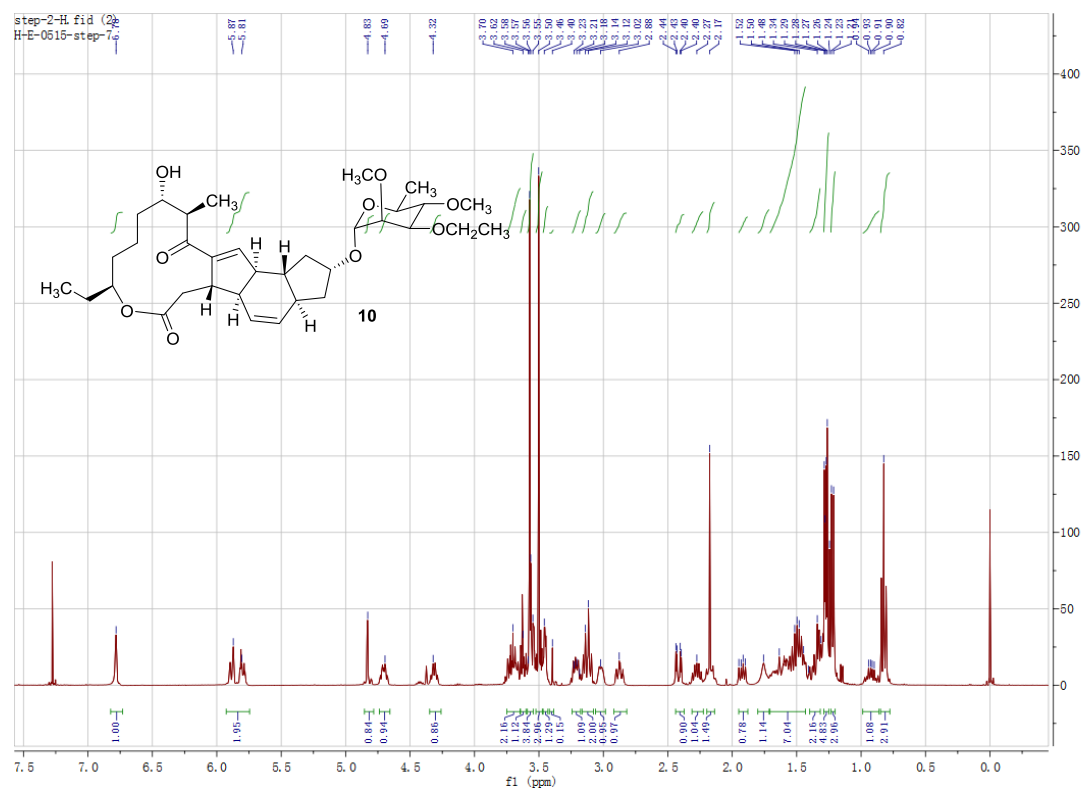

# <sup>13</sup>C NMR of 10

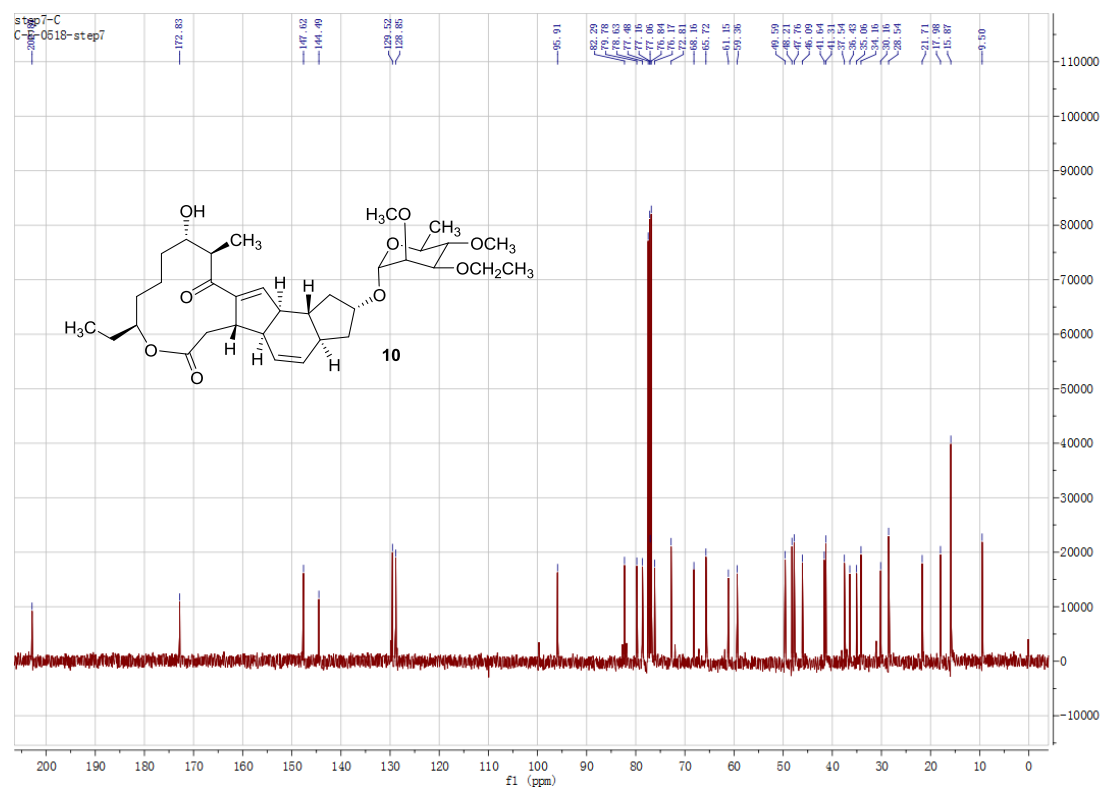

<sup>1</sup>H NMR of **12**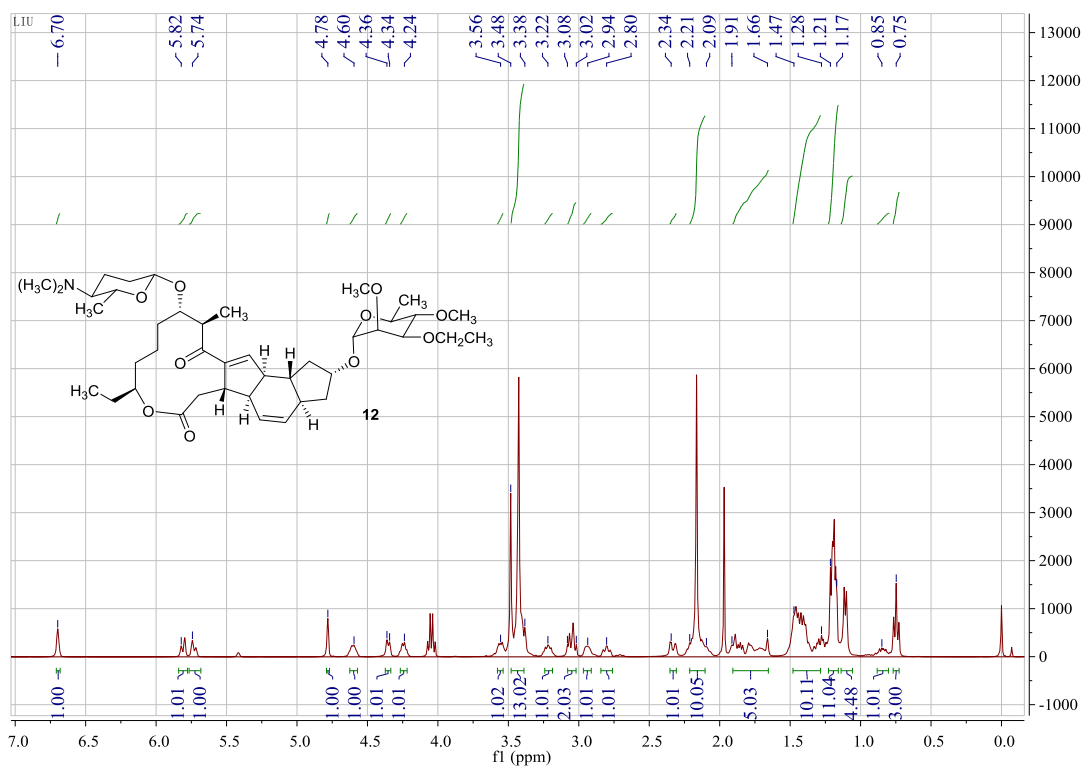 $^{13}\text{C}$  NMR of **12**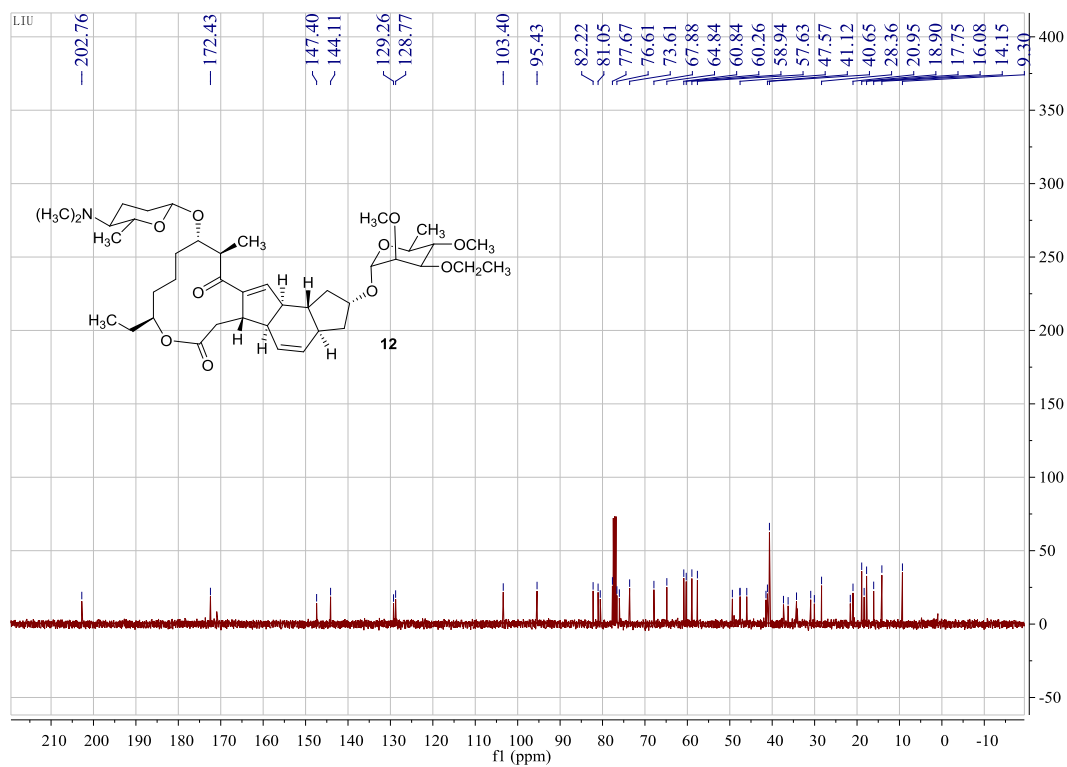

# <sup>1</sup>H NMR of 3'-O-ethyl-5, 6-dihydro spinosyn J

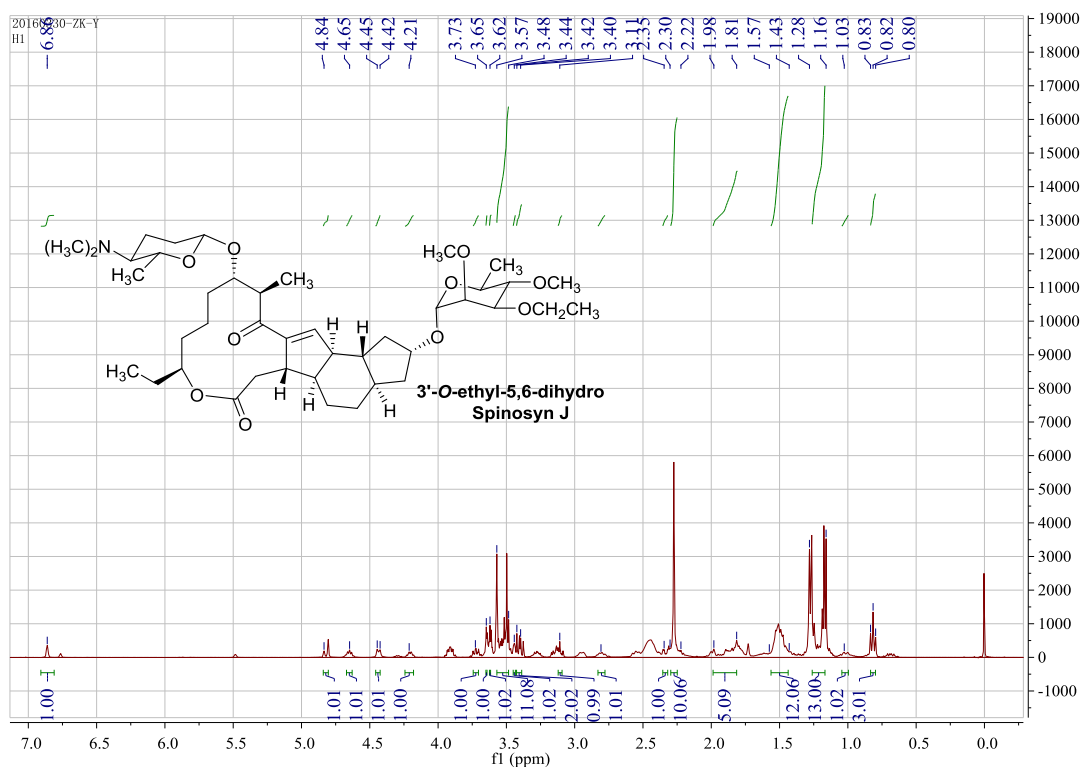

# <sup>13</sup>C NMR of 3'-O-ethyl-5, 6-dihydro spinosyn J

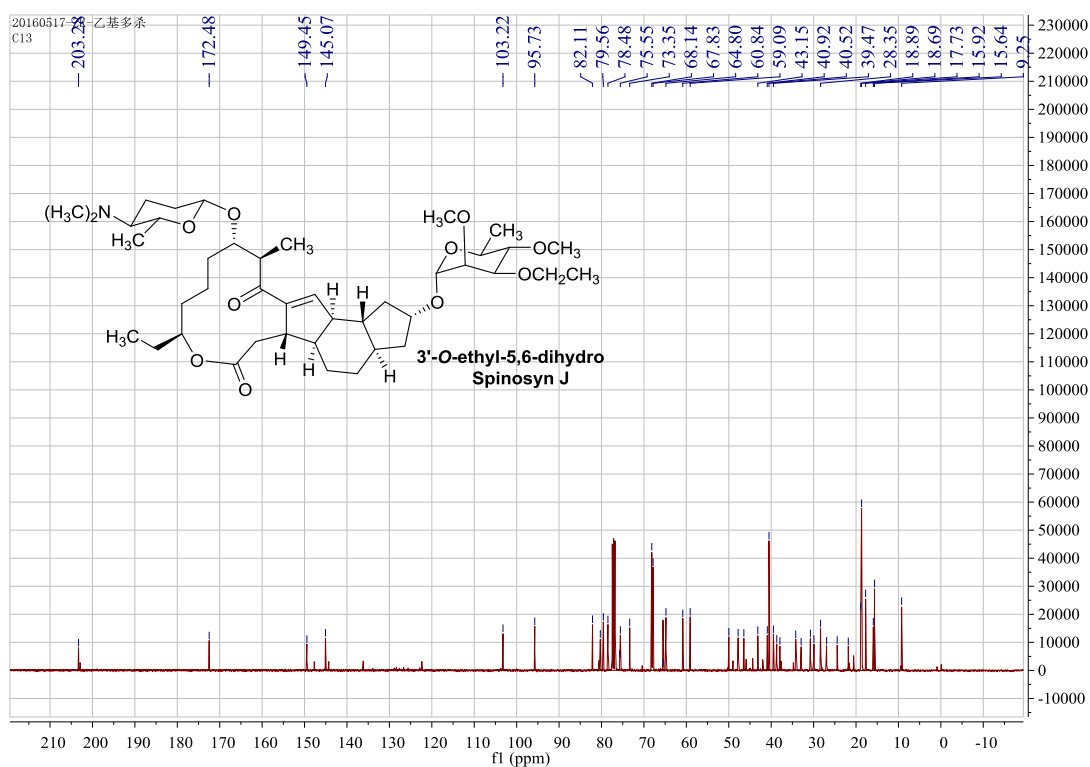

# MS of 1

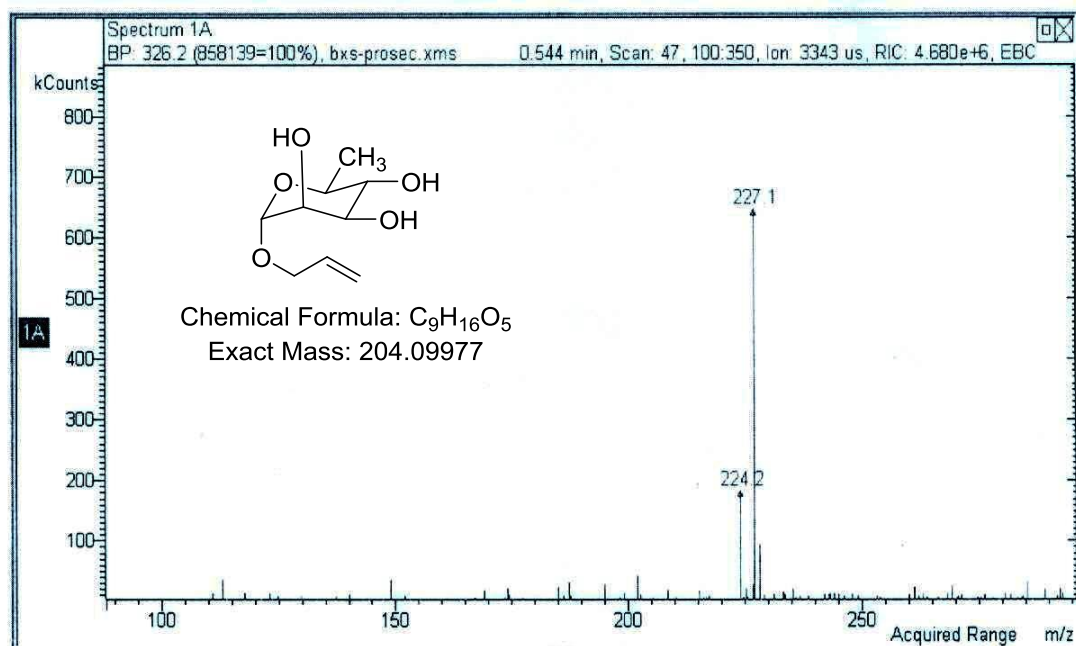

# MS of 2

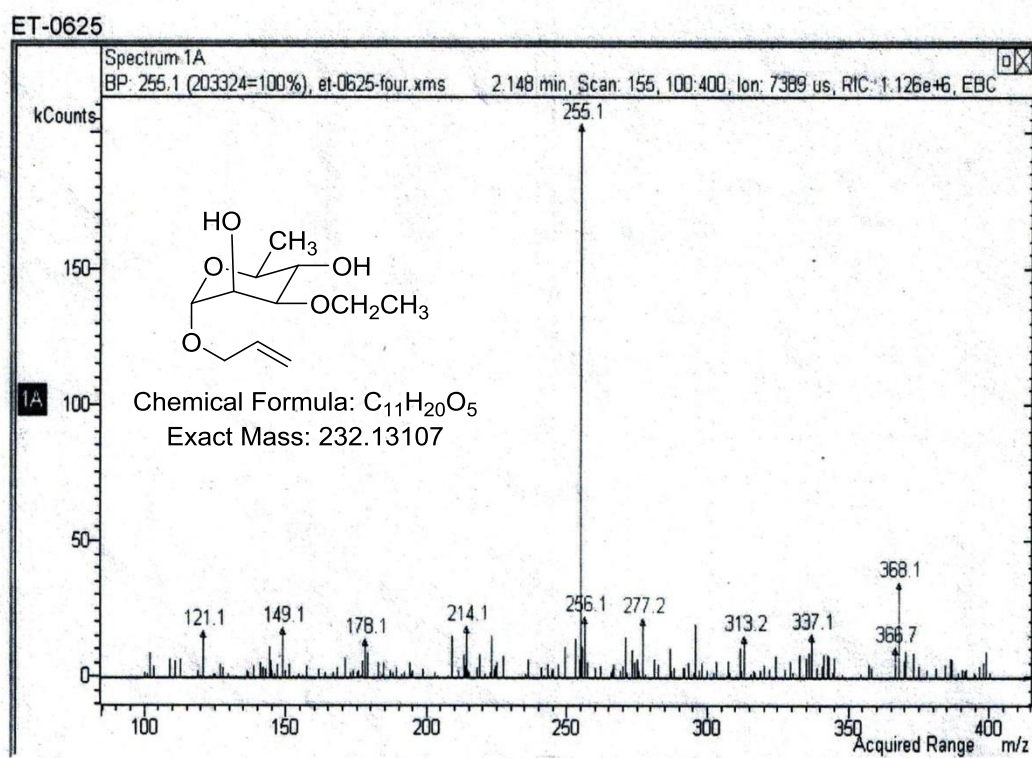



# MS of 3

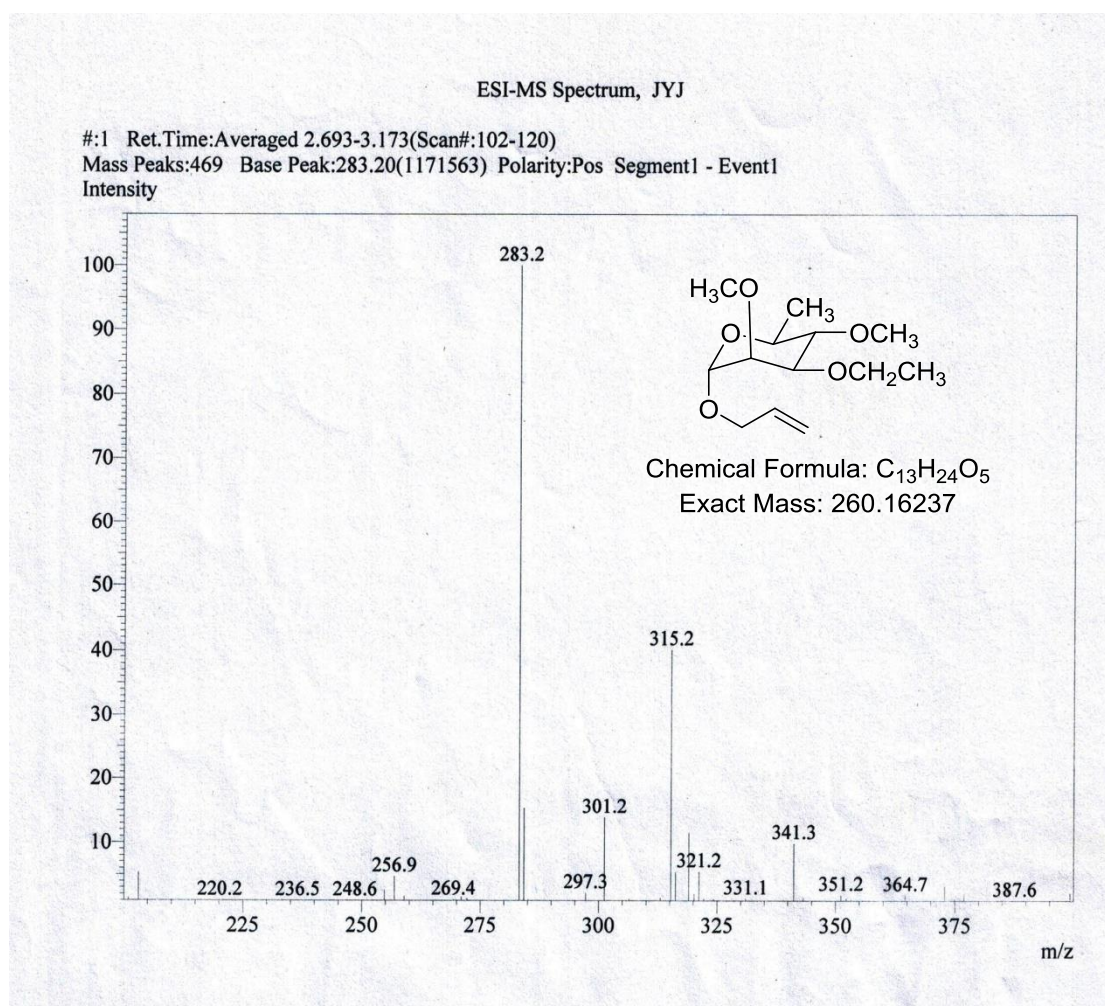

## MS of 4

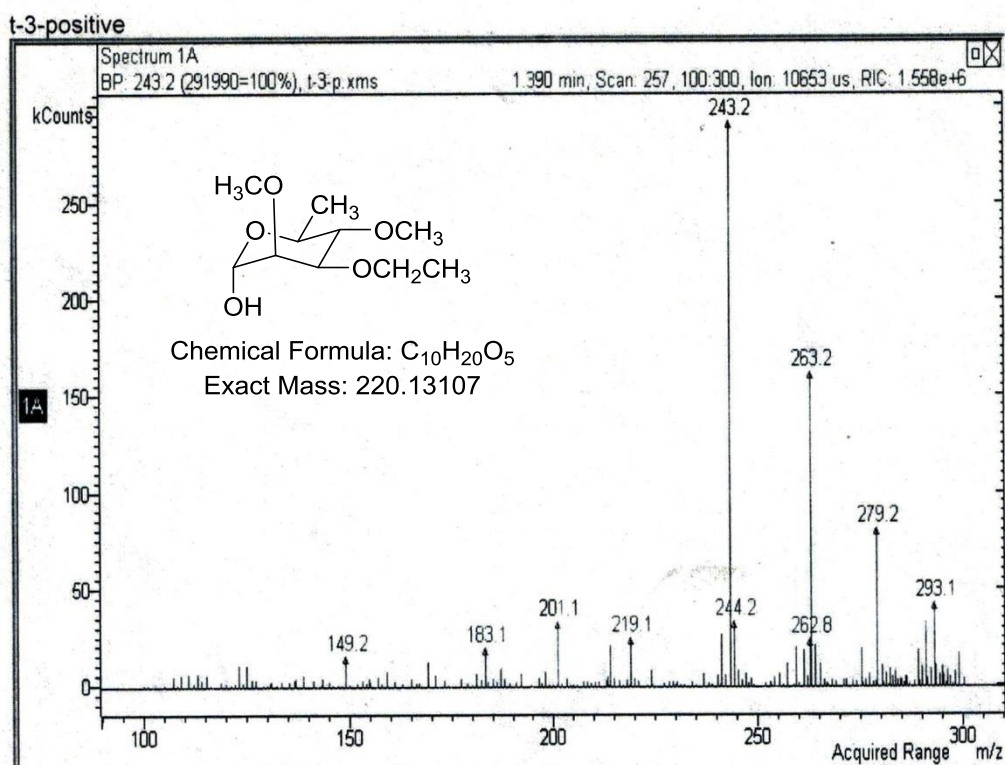

## MS of 5

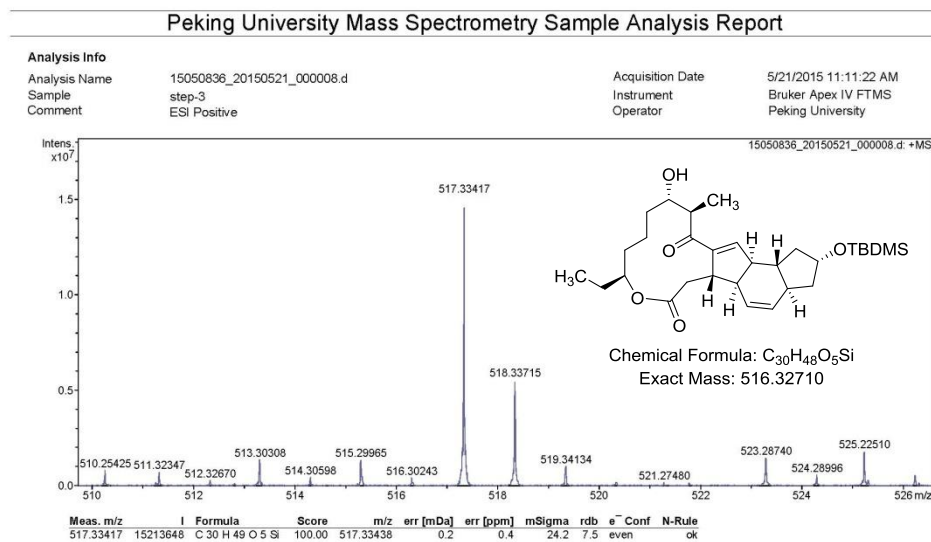

## MS of 6

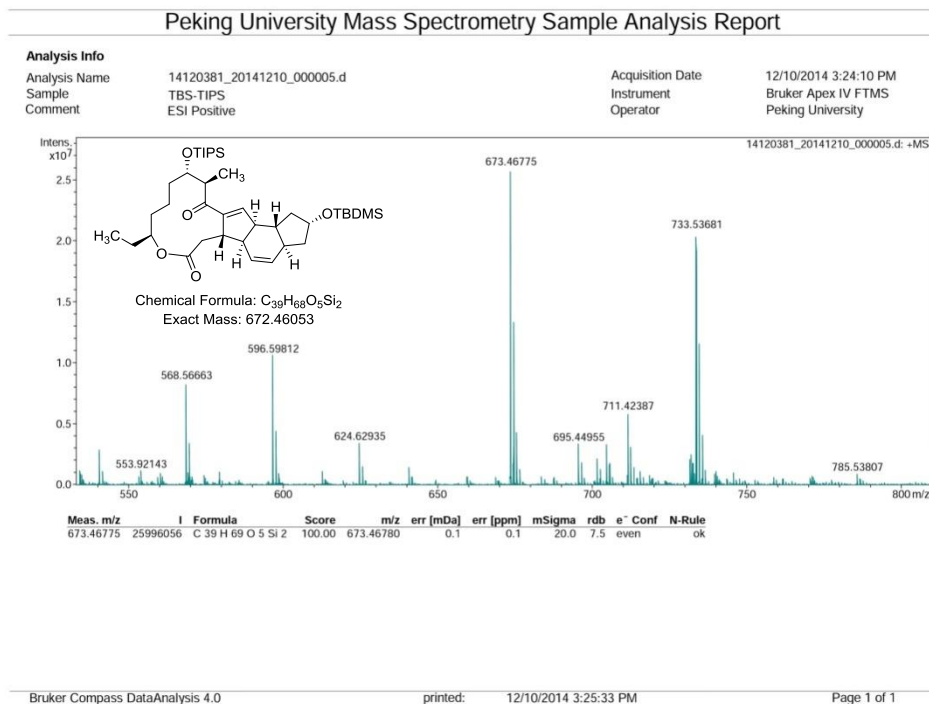

## MS of 7

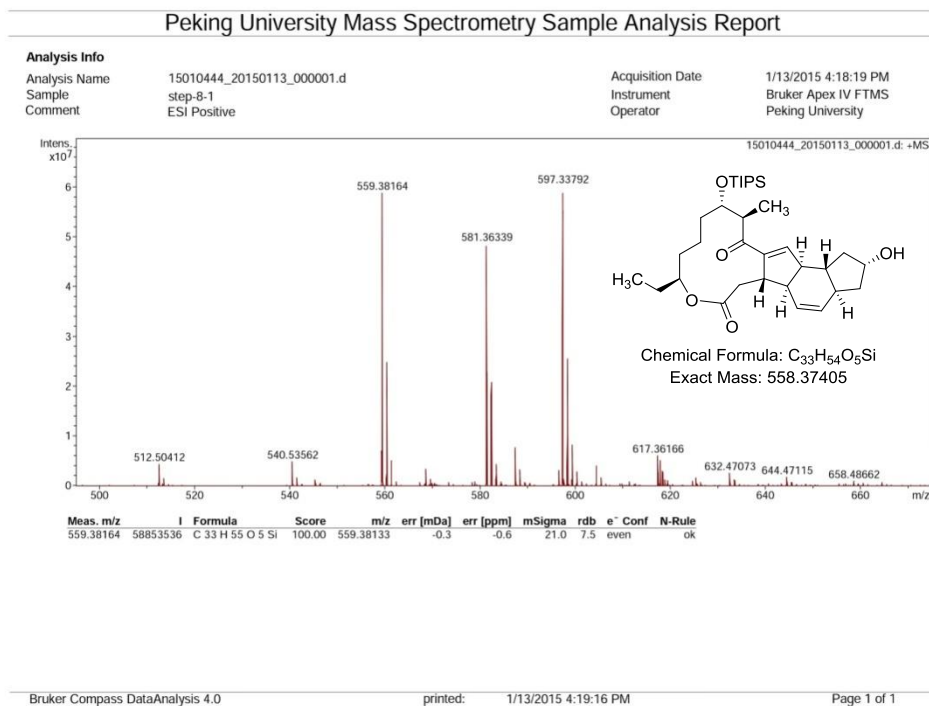

## MS of 9

# Peking University Mass Spectrometry Sample Analysis Report

### Analysis Info

|               |                            |
|---------------|----------------------------|
| Analysis Name | 15010682_20150120_000001.d |
| Sample        | step-9-1                   |
| Comment       | ESI Positive               |

|                  |                      |
|------------------|----------------------|
| Acquisition Date | 1/20/2015 8:40:19 AM |
| Instrument       | Bruker Apex IV FTMS  |
| Operator         | Peking University    |

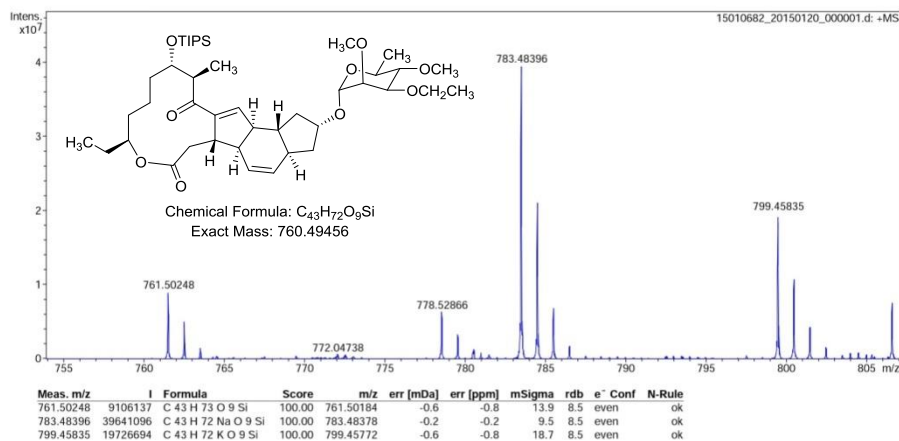

## Peking University Mass Spectrometry Sample Analysis Report

## Analysis Info

Analysis Name 15010998\_20150126\_000001.d  
Sample step-10-1  
Comment ESI Positive

Acquisition Date 1/26/2015 5:03:18 PM  
Instrument Bruker Apex IV FTMS  
Operator Peking University

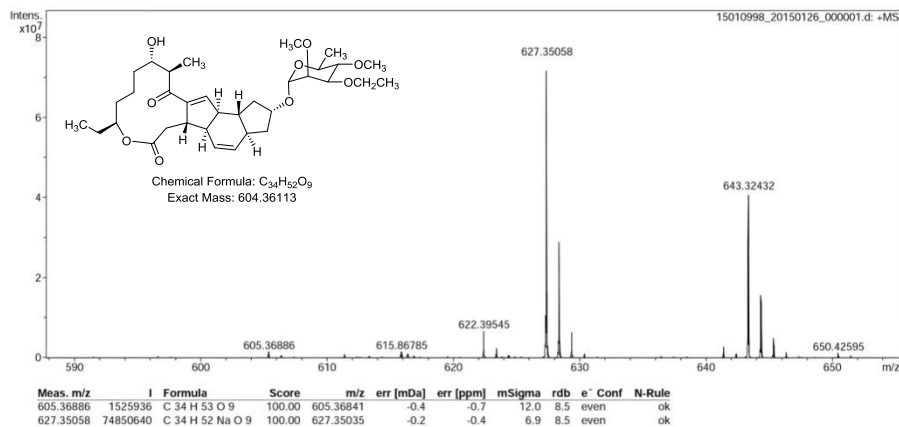

## MS of 12

## MALDI(p),745,20150818

## Analysis Info

Analysis Name D:\Data\MALDI\2015\0818\745\_0\_F5\_000001.d

Method MALDI\_N\_100-900

Sample Name

Comment

Acquisition Date 8/18/2015 3:30:31 PM

Operator

Instrument solariX

## Acquisition Parameter

Acquisition Mode Single MS  
Polarity Positive  
Broadband Low Mass 202.1 m/z  
Broadband High Mass 1400.0 m/z  
Source Accumulation 0.001 sec  
Ion Accumulation Time 0.300 sec

Acquired Scans 5  
No. of Cell Fills 1  
No. of Laser Shots 10  
Laser Power 29.6 lp  
Laser Shot Frequency 0.020 sec

Calibration Date Wed Aug 12 10:32:19  
Data Acquisition Size 2048576  
Data Processing Size 2097152  
Apodization Sine-Bell Multiplication

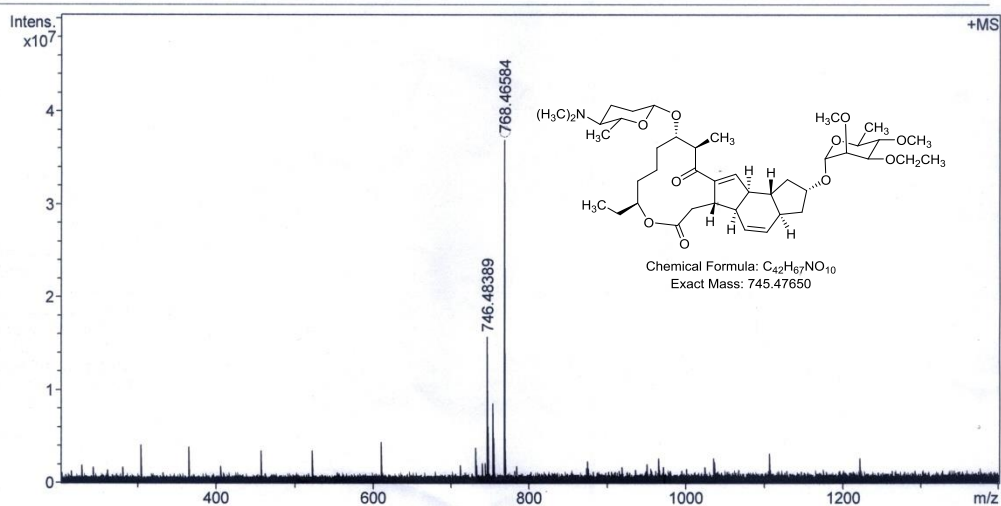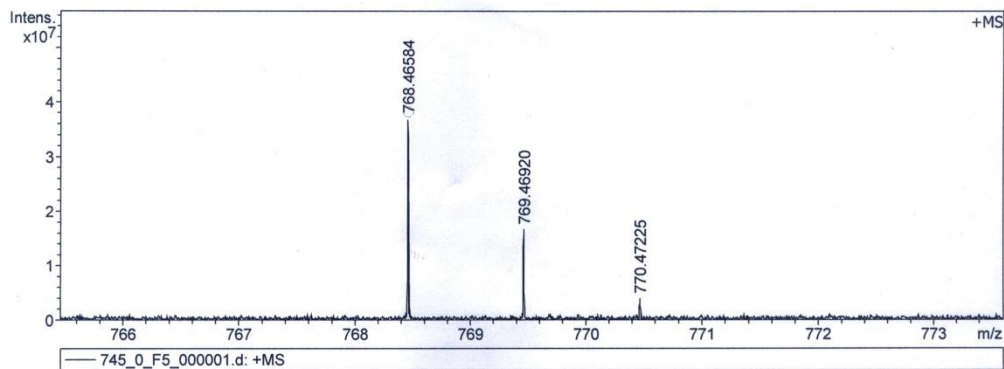

| Meas. m/z  | # | Ion Formula  | Score  | m/z        | err [ppm] | Mean err [ppm] | mSigma | rdb | e <sup>-</sup> Conf | N-Rule |
|------------|---|--------------|--------|------------|-----------|----------------|--------|-----|---------------------|--------|
| 768.465844 | 1 | C42H67NNaO10 | 100.00 | 768.465718 | 0.2       | -0.2           | 16.6   | 9.5 | even                | ok     |



# MS of 3'-O-ethyl-5, 6-dihydro spinosyn J

## MALDI,ZK-Y,20160127

### Analysis Info

Analysis Name D:\Data\MALDI\2016\0127\ZK-Y\_0\_G14\_000001.d  
Method MALDI\_P\_100-3000  
Sample Name  
Comment

Acquisition Date 1/27/2016 5:01:16 PM

Operator  
Instrument solariX

### Acquisition Parameter

|                       |            |                      |           |                       |                          |
|-----------------------|------------|----------------------|-----------|-----------------------|--------------------------|
| Acquisition Mode      | Single MS  | Acquired Scans       | 5         | Calibration Date      | Wed Jan 27 05:00:47      |
| Polarity              | Positive   | No. of Cell Fills    | 1         | Data Acquisition Size | 2048576                  |
| Broadband Low Mass    | 202.1 m/z  | No. of Laser Shots   | 10        | Data Processing Size  | 2097152                  |
| Broadband High Mass   | 1400.0 m/z | Laser Power          | 26.6 lp   | Apodization           | Sine-Bell Multiplication |
| Source Accumulation   | 0.001 sec  | Laser Shot Frequency | 0.020 sec |                       |                          |
| Ion Accumulation Time | 0.300 sec  |                      |           |                       |                          |

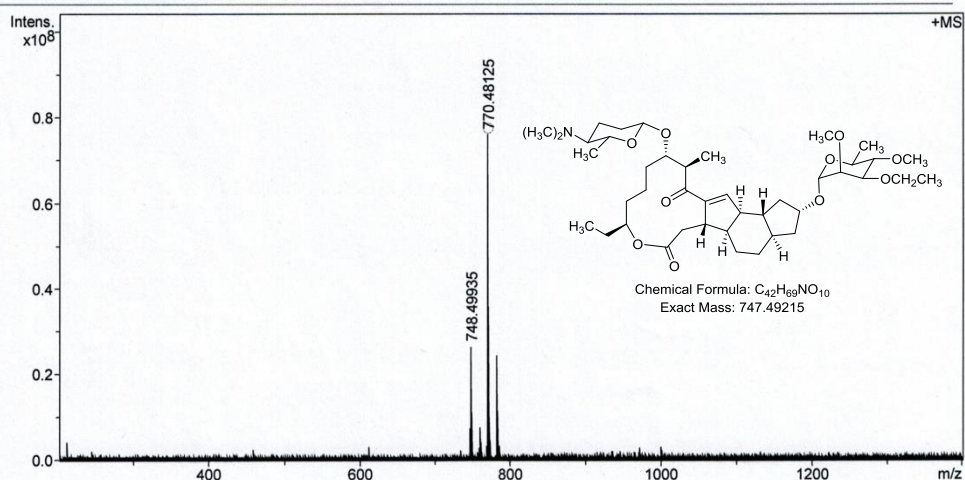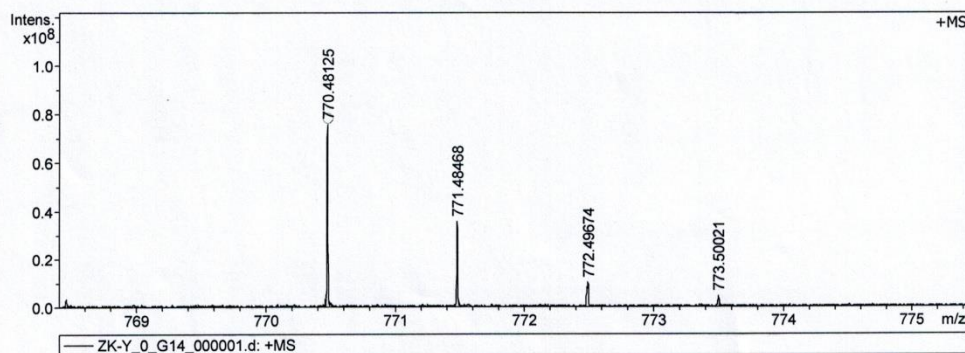

| Meas. m/z  | # | Ion Formula  | Score  | m/z        | err [ppm] | Mean err [ppm] | mSigma | rdB | e <sup>-</sup> Conf | N-Rule |
|------------|---|--------------|--------|------------|-----------|----------------|--------|-----|---------------------|--------|
| 770.481246 | 1 | C42H69NNaO10 | 100.00 | 770.481368 | -0.2      | 0.1            | 58.6   | 8.5 | even                | ok     |
